# Supplementary material for: Uncertainties, sensitivities and robustness of simulated water erosion in an EPIC-based global-gridded crop model
Source: Copernicus journal article supplement (doi:10.5194/bg-2020-93), 2020-04-21
Supplement: Supplementary file 2 [file TWCarr-si02.xlsx]

## Sheet: Table S2
EPIC parameter	EPIC parameter description	Distribution for density function	Range (triangular distribution or discrete values)
CHL	Channel length	Triangular	0.2; 0.8; 1.3
CHN	Manning N channel	Triangular	0.02; 0.1; 0.3
CHS	Channel slope	Triangular	0; 0.05; 0.3
EMX	Mixing efficiency	Triangular	0.2; 0.5; 0.8
HSG	Soil hydrologic group	Discrete	1; 2; 3; 4
LUN	Land use number	Discrete	1; 2; 3; 4; 5; 6; 7; 8; 9; 10; 11; 12; 13
OC	Organic carbon concentration	Triangular	0.001; 0.02; 0.1
OPV5	Plant population at planting	Triangular	50; 150; 200
ORHI	Crop residues left after harvest	Discrete	0; 0.25; 0.5; 0.75; 1
P23	Coefficient in RUSLE C factor equation (0.5-1.5) used in estimating the residue effect	Triangular	0.3; 0.5; 1.5
P26	Coefficient in RUSLE C factor equation (0.05-0.2) used in estimating the effect of growing plants	Triangular	0.01; 0.05; 0.2
P42	NRCS curve number index coefficient regulates the effect of PET in driving the NRCS curve number retention parameter (0.5-1.5)	Triangular	0.5; 1; 1.5
P65	Reduces NRCS runoff CN retention parameter for frozen soil Fraction of S frozen soil (0.05-0.5)	Triangular	0.05; 0.25; 0.5
P73	Upper limit of curve number retention parameter (Range: 1.0 - 2.0)	Triangular	1;1.5;2
P75	Runoff CN residue adjustment parameter. Increases runoff for RSD<1.0 t ha-1; decreases for RSD>1.0 (0-0.3)	Triangular	0; 0.05; 0.3
PRCP	Daily rainfall	Triangular	0.5; 1; 1.5
RIN	Ridge interval	Discrete	0.2; 0.4; 0.6; 0.8
ROK	Coarse fragment content	Triangular	0; 0.05; 0.5
RR	Random surface roughness created by tillage operation	Triangular	10; 20; 50
S18	Expresses soil temperature effect on erosion of frozen soils	Triangular	0.97; 1; 1.02
S23	Estimates fraction plant ground cover as a function of LAI. X=LAI	Triangular	0.5; 1; 1.5
S301	CN2 as % of the volume between FC and WP	Triangular	10; 20; 70
S302	CN3 as % of the volume between saturation and FC	Triangular	10; 20; 70
SAND	Sand content	Triangular	0.1; 0.5; 0.8
SILT	Silt content	Triangular	0.1; 0.3; 0.8
SLP	Slope steepness	Triangular	0; 0.05; 0.3
SLPL	Slope length	Triangular	100; 120; 200
SN	Surface N channel	Triangular	0.02; 0.1; 0.3
TMX	Air temperature max	Triangular	-4; 0; 4
WSX	Watershed area	Triangular	10; 50; 200

## Sheet: Table S3
Variable	Order	Equation	Mean	SD
CHL	first	AOF	0.000371105	0.000595488
CHN	first	AOF	0.000355399	0.000490961
CHS	first	AOF	0.000314192	0.000336395
EMX	first	AOF	0.00053876	0.000861878
HSG	first	AOF	0.0277179	0.0166936
LUN	first	AOF	0.01085	0.0145964
OC	first	AOF	0.000833525	0.00125269
OPV5	first	AOF	0.00125938	0.00314973
ORHI	first	AOF	0.0045934	0.00667116
P23	first	AOF	0.00203432	0.00224211
P26	first	AOF	0.000748975	0.00149635
P42	first	AOF	6.225e-05	0.000393704
P65	first	AOF	0.000112477	0.000424298
P73	first	AOF	6.225e-05	0.000393704
P75	first	AOF	0.00338933	0.00386777
PRCP	first	AOF	0.129253	0.0386435
RIN	first	AOF	0.000195242	0.000444357
ROK	first	AOF	0.000891153	0.0011099
RR	first	AOF	0.00025469	0.00054466
S18	first	AOF	0.000100601	0.0004057
S23	first	AOF	0.000523157	0.000513301
S301	first	AOF	0.00644198	0.00435369
S302	first	AOF	0.000803998	0.000561467
SAND	first	AOF	0.00187856	0.00143426
SILT	first	AOF	0.0155815	0.00649282
SLP	first	AOF	0.471528	0.164181
SN	first	AOF	0.000287995	0.000479816
SPLG	first	AOF	0.00200854	0.00123816
TMX	first	AOF	0.00297476	0.00470388
WSX	first	AOF	0.000215688	0.000410252
CHL	first	MUSL	0.000539245	0.000418737
CHN	first	MUSL	0.000482813	0.000334273
CHS	first	MUSL	0.000461225	0.000293711
EMX	first	MUSL	0.000502066	0.000833345
HSG	first	MUSL	0.0408359	0.0196199
LUN	first	MUSL	0.0159754	0.0136942
OC	first	MUSL	0.000752109	0.00125242
OPV5	first	MUSL	0.00113654	0.0028961
ORHI	first	MUSL	0.00430227	0.00624364
P23	first	MUSL	0.00177502	0.00204289
P26	first	MUSL	0.000565223	0.001184
P42	first	MUSL	6.8e-06	4.3007e-05
P65	first	MUSL	6.4149e-05	0.000198296
P73	first	MUSL	6.8e-06	4.3007e-05
P75	first	MUSL	0.00862655	0.00697861
PRCP	first	MUSL	0.0980572	0.0336521
RIN	first	MUSL	0.000141222	0.000196419
ROK	first	MUSL	0.00105813	0.00123026
RR	first	MUSL	0.000207882	0.000427105
S18	first	MUSL	4.99758e-05	0.000153231
S23	first	MUSL	0.000607664	0.000792233
S301	first	MUSL	0.010952	0.00616015
S302	first	MUSL	0.00113237	0.000625741
SAND	first	MUSL	0.00246365	0.00191341
SILT	first	MUSL	0.0151193	0.00746764
SLP	first	MUSL	0.465037	0.176948
SN	first	MUSL	0.000318874	0.000475656
SPLG	first	MUSL	0.00163237	0.00170959
TMX	first	MUSL	0.00262826	0.00401591
WSX	first	MUSL	0.0016102	0.00154188
CHL	first	MUSS	0.000604603	0.000308638
CHN	first	MUSS	0.000442785	0.000326342
CHS	first	MUSS	0.000551655	0.000372543
EMX	first	MUSS	0.00055398	0.000888174
HSG	first	MUSS	0.052192	0.0191804
LUN	first	MUSS	0.0197829	0.0115346
OC	first	MUSS	0.000825657	0.00121905
OPV5	first	MUSS	0.00185781	0.00524783
ORHI	first	MUSS	0.00499878	0.00693148
P23	first	MUSS	0.00203131	0.00213726
P26	first	MUSS	0.00101444	0.00222179
P42	first	MUSS	8.975e-06	5.67629e-05
P65	first	MUSS	6.1339e-05	0.000176804
P73	first	MUSS	8.975e-06	5.67629e-05
P75	first	MUSS	0.0105889	0.00709195
PRCP	first	MUSS	0.116545	0.0353039
RIN	first	MUSS	0.000168914	0.000188456
ROK	first	MUSS	0.00115075	0.00122917
RR	first	MUSS	0.000210128	0.000403775
S18	first	MUSS	4.67144e-05	0.000152562
S23	first	MUSS	0.000587193	0.00059028
S301	first	MUSS	0.0144789	0.00702233
S302	first	MUSS	0.00115707	0.000663492
SAND	first	MUSS	0.00197949	0.00176184
SILT	first	MUSS	0.014415	0.007191
SLP	first	MUSS	0.457342	0.174922
SN	first	MUSS	0.000340227	0.00029453
SPLG	first	MUSS	0.00106992	0.000722471
TMX	first	MUSS	0.00275948	0.00414535
WSX	first	MUSS	0.000236631	0.000232991
CHL	first	MUST	0.000446332	0.000251923
CHN	first	MUST	0.000422458	0.000285492
CHS	first	MUST	0.000438885	0.00027784
EMX	first	MUST	0.000513775	0.000848612
HSG	first	MUST	0.0416704	0.0200843
LUN	first	MUST	0.0159487	0.01366
OC	first	MUST	0.00078214	0.00128821
OPV5	first	MUST	0.0012123	0.00339482
ORHI	first	MUST	0.004463	0.00644632
P23	first	MUST	0.00177852	0.0020659
P26	first	MUST	0.000631629	0.00125945
P42	first	MUST	7.95e-06	5.02802e-05
P65	first	MUST	6.30435e-05	0.000211198
P73	first	MUST	7.95e-06	5.02802e-05
P75	first	MUST	0.00801563	0.00691061
PRCP	first	MUST	0.0926769	0.0331082
RIN	first	MUST	0.000153202	0.000205582
ROK	first	MUST	0.00105625	0.00121696
RR	first	MUST	0.000209925	0.000419232
S18	first	MUST	5.48848e-05	0.000167105
S23	first	MUST	0.000522344	0.000520775
S301	first	MUST	0.0113042	0.00643576
S302	first	MUST	0.00106518	0.000624037
SAND	first	MUST	0.002237	0.00175994
SILT	first	MUST	0.0158935	0.00771528
SLP	first	MUST	0.4794	0.182452
SN	first	MUST	0.000276319	0.000208016
SPLG	first	MUST	0.0016203	0.00109924
TMX	first	MUST	0.00269623	0.00435952
WSX	first	MUST	0.000167575	0.000144426
CHL	first	RUS2	0.00247932	0.00268435
CHN	first	RUS2	0.00489867	0.00392309
CHS	first	RUS2	0.00263797	0.00245463
EMX	first	RUS2	0.000354374	0.000489662
HSG	first	RUS2	0.0252441	0.0120579
LUN	first	RUS2	0.00921225	0.00788608
OC	first	RUS2	0.00195865	0.0083577
OPV5	first	RUS2	0.00160121	0.0039879
ORHI	first	RUS2	0.00267768	0.00423604
P23	first	RUS2	0.00142905	0.00158672
P26	first	RUS2	0.00147978	0.00309036
P42	first	RUS2	4.75e-05	0.000300416
P65	first	RUS2	0.000126963	0.000438984
P73	first	RUS2	4.75e-05	0.000300416
P75	first	RUS2	0.00224199	0.00123623
PRCP	first	RUS2	0.159736	0.0547343
RIN	first	RUS2	0.000222946	0.000332362
ROK	first	RUS2	0.00166839	0.00438316
RR	first	RUS2	0.000288241	0.000435077
S18	first	RUS2	9.41264e-05	0.00031452
S23	first	RUS2	0.000579692	0.000555473
S301	first	RUS2	0.00535036	0.00338403
S302	first	RUS2	0.000685817	0.000560702
SAND	first	RUS2	0.0143815	0.00834951
SILT	first	RUS2	0.00149837	0.00166679
SLP	first	RUS2	0.459266	0.147449
SN	first	RUS2	0.00791183	0.011022
SPLG	first	RUS2	0.00105957	0.000883208
TMX	first	RUS2	0.00409512	0.00754133
WSX	first	RUS2	0.00090424	0.000624473
CHL	first	RUSL	0.000276858	0.000759595
CHN	first	RUSL	0.000272291	0.000725309
CHS	first	RUSL	0.000248198	0.000658665
EMX	first	RUSL	0.000603479	0.000988242
HSG	first	RUSL	0.00191448	0.00260019
LUN	first	RUSL	0.000405676	0.000736374
OC	first	RUSL	0.000563258	0.000979946
OPV5	first	RUSL	0.00174903	0.00405393
ORHI	first	RUSL	0.00589406	0.00831704
P23	first	RUSL	0.00388098	0.00440712
P26	first	RUSL	0.000997258	0.00200629
P42	first	RUSL	0.00011325	0.000716256
P65	first	RUSL	0.000133182	0.000715824
P73	first	RUSL	0.00011325	0.000716256
P75	first	RUSL	0.000577067	0.000734661
PRCP	first	RUSL	0.197762	0.0689714
RIN	first	RUSL	0.000200367	0.000737027
ROK	first	RUSL	0.000491992	0.000859739
RR	first	RUSL	0.000196646	0.00069993
S18	first	RUSL	0.000122571	0.000715229
S23	first	RUSL	0.000632173	0.00098164
S301	first	RUSL	0.000535862	0.000719321
S302	first	RUSL	0.00028416	0.000625167
SAND	first	RUSL	0.0512738	0.0115998
SILT	first	RUSL	0.00263607	0.001777
SLP	first	RUSL	0.498108	0.0968252
SN	first	RUSL	0.000271359	0.000746261
SPLG	first	RUSL	0.00340547	0.0011992
TMX	first	RUSL	0.00671313	0.0115178
WSX	first	RUSL	0.00022914	0.00072103
CHL	first	USLE	0.000346686	0.000918711
CHN	first	USLE	0.000357459	0.000909902
CHS	first	USLE	0.000315682	0.000814637
EMX	first	USLE	0.000609545	0.00108486
HSG	first	USLE	0.00277147	0.00365948
LUN	first	USLE	0.000601558	0.000970617
OC	first	USLE	0.00107267	0.00178105
OPV5	first	USLE	0.0014788	0.00327582
ORHI	first	USLE	0.00510206	0.00689485
P23	first	USLE	0.00295014	0.00308359
P26	first	USLE	0.000874903	0.00183823
P42	first	USLE	0.000135	0.000853815
P65	first	USLE	0.000151858	0.000852263
P73	first	USLE	0.000135	0.000853815
P75	first	USLE	0.000788332	0.000900508
PRCP	first	USLE	0.175691	0.0637437
RIN	first	USLE	0.000223471	0.00090858
ROK	first	USLE	0.000510876	0.0010349
RR	first	USLE	0.000235261	0.000840598
S18	first	USLE	0.000149455	0.000852517
S23	first	USLE	0.000726798	0.000941633
S301	first	USLE	0.000769508	0.00101697
S302	first	USLE	0.000322772	0.000769126
SAND	first	USLE	0.0022196	0.00296381
SILT	first	USLE	0.0157751	0.00505963
SLP	first	USLE	0.542058	0.111416
SN	first	USLE	0.00033848	0.000933282
SPLG	first	USLE	0.00308551	0.00143245
TMX	first	USLE	0.00600725	0.0101743
WSX	first	USLE	0.000275517	0.000881426
CHL	total	AOF	0.00147792	0.00374325
CHN	total	AOF	0.00143216	0.00367354
CHS	total	AOF	0.00151338	0.00376611
EMX	total	AOF	0.00188848	0.00411032
HSG	total	AOF	0.0861404	0.0858334
LUN	total	AOF	0.0467175	0.102137
OC	total	AOF	0.0056599	0.0191515
OPV5	total	AOF	0.00506701	0.0194181
ORHI	total	AOF	0.0150424	0.0199029
P23	total	AOF	0.00620182	0.00752832
P26	total	AOF	0.0040367	0.00990559
P42	total	AOF	0.000569625	0.00360262
P65	total	AOF	0.000753677	0.0037019
P73	total	AOF	0.000569625	0.00360262
P75	total	AOF	0.0134385	0.0153477
PRCP	total	AOF	0.280474	0.0788817
RIN	total	AOF	0.000904984	0.00344924
ROK	total	AOF	0.00267868	0.00672854
RR	total	AOF	0.00104151	0.00375303
S18	total	AOF	0.000742096	0.00361553
S23	total	AOF	0.00383384	0.00871241
S301	total	AOF	0.020214	0.0148584
S302	total	AOF	0.00292228	0.00429814
SAND	total	AOF	0.0145537	0.0226985
SILT	total	AOF	0.0678734	0.0759171
SLP	total	AOF	0.681161	0.15751
SN	total	AOF	0.00120828	0.00350291
SPLG	total	AOF	0.00642772	0.0167056
TMX	total	AOF	0.0160625	0.027896
WSX	total	AOF	0.0012519	0.00369659
CHL	total	MUSL	0.00212815	0.00432117
CHN	total	MUSL	0.00159687	0.0038067
CHS	total	MUSL	0.00274573	0.00428611
EMX	total	MUSL	0.00194431	0.00414963
HSG	total	MUSL	0.117749	0.092332
LUN	total	MUSL	0.0685001	0.133282
OC	total	MUSL	0.00445757	0.010903
OPV5	total	MUSL	0.00470588	0.0172502
ORHI	total	MUSL	0.0141107	0.0183821
P23	total	MUSL	0.00586088	0.00753166
P26	total	MUSL	0.00348506	0.00734808
P42	total	MUSL	0.00055555	0.00351361
P65	total	MUSL	0.000680469	0.00352382
P73	total	MUSL	0.00055555	0.00351361
P75	total	MUSL	0.0145734	0.0164838
PRCP	total	MUSL	0.227416	0.0781561
RIN	total	MUSL	0.000982685	0.00343175
ROK	total	MUSL	0.0030577	0.0084501
RR	total	MUSL	0.00113562	0.00390143
S18	total	MUSL	0.000746428	0.00353606
S23	total	MUSL	0.0029585	0.00622908
S301	total	MUSL	0.0304666	0.0193778
S302	total	MUSL	0.00395648	0.00440929
SAND	total	MUSL	0.0138043	0.016461
SILT	total	MUSL	0.0668728	0.079882
SLP	total	MUSL	0.674784	0.164696
SN	total	MUSL	0.00187565	0.00410175
SPLG	total	MUSL	0.00677591	0.0108573
TMX	total	MUSL	0.0170511	0.0293704
WSX	total	MUSL	0.00481047	0.011269
CHL	total	MUSS	0.00163295	0.00368209
CHN	total	MUSS	0.00123503	0.00324006
CHS	total	MUSS	0.0023236	0.00422888
EMX	total	MUSS	0.00164308	0.00370542
HSG	total	MUSS	0.126025	0.08796
LUN	total	MUSS	0.0726032	0.136673
OC	total	MUSS	0.00369956	0.00771022
OPV5	total	MUSS	0.00359941	0.00947847
ORHI	total	MUSS	0.0152001	0.0192371
P23	total	MUSS	0.00566501	0.00675549
P26	total	MUSS	0.00356387	0.00695182
P42	total	MUSS	0.0005246	0.00331786
P65	total	MUSS	0.000634223	0.00332028
P73	total	MUSS	0.0005246	0.00331786
P75	total	MUSS	0.0197472	0.0168743
PRCP	total	MUSS	0.224449	0.0834948
RIN	total	MUSS	0.000982776	0.00334725
ROK	total	MUSS	0.00295372	0.00747237
RR	total	MUSS	0.00108375	0.00373188
S18	total	MUSS	0.000711391	0.00334246
S23	total	MUSS	0.00185347	0.00388792
S301	total	MUSS	0.0334591	0.0185751
S302	total	MUSS	0.002954	0.00397008
SAND	total	MUSS	0.010355	0.0181712
SILT	total	MUSS	0.0524982	0.0873729
SLP	total	MUSS	0.633881	0.146058
SN	total	MUSS	0.00155582	0.00378308
SPLG	total	MUSS	0.00342769	0.00446776
TMX	total	MUSS	0.0145412	0.02579
WSX	total	MUSS	0.00134662	0.00364325
CHL	total	MUST	0.00148379	0.00368148
CHN	total	MUST	0.0012546	0.00333304
CHS	total	MUST	0.00234637	0.00407186
EMX	total	MUST	0.00193311	0.0041482
HSG	total	MUST	0.118866	0.094301
LUN	total	MUST	0.0676255	0.135985
OC	total	MUST	0.00380431	0.00832412
OPV5	total	MUST	0.00269554	0.00833722
ORHI	total	MUST	0.015005	0.0196601
P23	total	MUST	0.00577094	0.00737767
P26	total	MUST	0.00278327	0.00574235
P42	total	MUST	0.00056065	0.00354586
P65	total	MUST	0.000697296	0.00356977
P73	total	MUST	0.00056065	0.00354586
P75	total	MUST	0.012258	0.014488
PRCP	total	MUST	0.20732	0.0760058
RIN	total	MUST	0.000960245	0.00349309
ROK	total	MUST	0.00279853	0.00705381
RR	total	MUST	0.00103148	0.00375404
S18	total	MUST	0.000747575	0.00356936
S23	total	MUST	0.0022242	0.00419047
S301	total	MUST	0.0312503	0.0200748
S302	total	MUST	0.00370825	0.00436083
SAND	total	MUST	0.0126685	0.0172641
SILT	total	MUST	0.0664448	0.0822559
SLP	total	MUST	0.678706	0.161814
SN	total	MUST	0.00155183	0.00376331
SPLG	total	MUST	0.00412066	0.00428847
TMX	total	MUST	0.0154817	0.0270184
WSX	total	MUST	0.00138084	0.00359601
CHL	total	RUS2	0.0119381	0.00941857
CHN	total	RUS2	0.013864	0.00841343
CHS	total	RUS2	0.00754775	0.00616231
EMX	total	RUS2	0.00151674	0.00386208
HSG	total	RUS2	0.076567	0.0788593
LUN	total	RUS2	0.047106	0.135351
OC	total	RUS2	0.00379937	0.00971422
OPV5	total	RUS2	0.00410916	0.0105883
ORHI	total	RUS2	0.0105399	0.0126928
P23	total	RUS2	0.00592891	0.00688166
P26	total	RUS2	0.00473612	0.0101601
P42	total	RUS2	0.00057745	0.00365211
P65	total	RUS2	0.000892514	0.0038427
P73	total	RUS2	0.00057745	0.00365211
P75	total	RUS2	0.00702198	0.0142597
PRCP	total	RUS2	0.320394	0.109792
RIN	total	RUS2	0.0010786	0.00353053
ROK	total	RUS2	0.00421666	0.00893033
RR	total	RUS2	0.00118595	0.00372366
S18	total	RUS2	0.000798651	0.00371732
S23	total	RUS2	0.00350063	0.00648943
S301	total	RUS2	0.0295417	0.0201764
S302	total	RUS2	0.0017369	0.00376343
SAND	total	RUS2	0.0409327	0.0207528
SILT	total	RUS2	0.0223504	0.0859949
SLP	total	RUS2	0.658842	0.147593
SN	total	RUS2	0.0213197	0.0207089
SPLG	total	RUS2	0.00621413	0.0092998
TMX	total	RUS2	0.0217899	0.0400193
WSX	total	RUS2	0.00292335	0.00386434
CHL	total	RUSL	0.00118133	0.00427618
CHN	total	RUSL	0.00111033	0.00395275
CHS	total	RUSL	0.00108625	0.00408491
EMX	total	RUSL	0.00200959	0.0044793
HSG	total	RUSL	0.00302765	0.00484264
LUN	total	RUSL	0.00265546	0.00467723
OC	total	RUSL	0.00269054	0.00701888
OPV5	total	RUSL	0.00644391	0.0212046
ORHI	total	RUSL	0.0116506	0.0158893
P23	total	RUSL	0.00875268	0.010306
P26	total	RUSL	0.00368954	0.0102312
P42	total	RUSL	0.000659225	0.0041693
P65	total	RUSL	0.000688239	0.00416517
P73	total	RUSL	0.000659225	0.0041693
P75	total	RUSL	0.00212771	0.00394564
PRCP	total	RUSL	0.358253	0.108382
RIN	total	RUSL	0.000853096	0.0040346
ROK	total	RUSL	0.00268018	0.00780782
RR	total	RUSL	0.000989876	0.00416974
S18	total	RUSL	0.000686381	0.00416564
S23	total	RUSL	0.00242703	0.00623705
S301	total	RUSL	0.00245226	0.00506057
S302	total	RUSL	0.00115983	0.0041507
SAND	total	RUSL	0.115284	0.0302416
SILT	total	RUSL	0.00974923	0.0166933
SLP	total	RUSL	0.692574	0.0673658
SN	total	RUSL	0.000989725	0.00413488
SPLG	total	RUSL	0.00622026	0.014296
TMX	total	RUSL	0.020992	0.0332404
WSX	total	RUSL	0.00105343	0.00429274
CHL	total	USLE	0.00115542	0.00376229
CHN	total	USLE	0.00117737	0.0035999
CHS	total	USLE	0.00108219	0.0036633
EMX	total	USLE	0.00208027	0.00421285
HSG	total	USLE	0.00806534	0.0102628
LUN	total	USLE	0.00351095	0.00536391
OC	total	USLE	0.00366632	0.00778858
OPV5	total	USLE	0.00726542	0.0270251
ORHI	total	USLE	0.0131813	0.0172864
P23	total	USLE	0.006682	0.00830333
P26	total	USLE	0.00402637	0.0104475
P42	total	USLE	0.0005935	0.00375362
P65	total	USLE	0.000653097	0.00374756
P73	total	USLE	0.0005935	0.00375362
P75	total	USLE	0.0032264	0.00390362
PRCP	total	USLE	0.356118	0.10853
RIN	total	USLE	0.000793133	0.00341498
ROK	total	USLE	0.00262516	0.00660519
RR	total	USLE	0.000874143	0.0037101
S18	total	USLE	0.000643345	0.00374878
S23	total	USLE	0.00317295	0.00725413
S301	total	USLE	0.00399455	0.00596136
S302	total	USLE	0.00143113	0.00388523
SAND	total	USLE	0.0135871	0.015215
SILT	total	USLE	0.0516747	0.0259659
SLP	total	USLE	0.748916	0.0684739
SN	total	USLE	0.00097112	0.00362083
SPLG	total	USLE	0.00646785	0.0167357
TMX	total	USLE	0.022862	0.0370082
WSX	total	USLE	0.000986978	0.00383799

## Sheet: Table S4
Variable	Order	Equation	Spearman
CHL	first	AOF	0.156
CHN	first	AOF	0.014
CHS	first	AOF	-0.093
EMX	first	AOF	0.041
HSG	first	AOF	-0.419
LUN	first	AOF	-0.521
OC	first	AOF	-0.112
OPV5	first	AOF	0.123
ORHI	first	AOF	-0.15
P23	first	AOF	0.05
P26	first	AOF	-0.015
P42	first	AOF	0.035
P65	first	AOF	0.026
P73	first	AOF	0.035
P75	first	AOF	-0.257
PRCP	first	AOF	-0.205
RIN	first	AOF	-0.15
ROK	first	AOF	-0.182
RR	first	AOF	-0.095
S18	first	AOF	-0.012
S23	first	AOF	0.221
S301	first	AOF	-0.136
S302	first	AOF	0.129
SAND	first	AOF	0.192
SILT	first	AOF	0.707
SLP	first	AOF	0.675
SN	first	AOF	-0.173
SPLG	first	AOF	0.431
TMX	first	AOF	-0.277
WSX	first	AOF	0.049
CHL	first	MUSL	0.225
CHN	first	MUSL	-0.037
CHS	first	MUSL	-0.177
EMX	first	MUSL	-0.024
HSG	first	MUSL	-0.322
LUN	first	MUSL	-0.502
OC	first	MUSL	0.095
OPV5	first	MUSL	0.232
ORHI	first	MUSL	-0.145
P23	first	MUSL	-0.044
P26	first	MUSL	0.065
P42	first	MUSL	-0.035
P65	first	MUSL	-0.005
P73	first	MUSL	-0.035
P75	first	MUSL	-0.257
PRCP	first	MUSL	-0.341
RIN	first	MUSL	-0.311
ROK	first	MUSL	-0.118
RR	first	MUSL	-0.105
S18	first	MUSL	-0.149
S23	first	MUSL	0.306
S301	first	MUSL	-0.128
S302	first	MUSL	0.252
SAND	first	MUSL	0.188
SILT	first	MUSL	0.752
SLP	first	MUSL	0.709
SN	first	MUSL	-0.257
SPLG	first	MUSL	0.642
TMX	first	MUSL	-0.359
WSX	first	MUSL	0.608
CHL	first	MUSS	0.162
CHN	first	MUSS	-0.131
CHS	first	MUSS	-0.199
EMX	first	MUSS	0.063
HSG	first	MUSS	-0.063
LUN	first	MUSS	-0.378
OC	first	MUSS	0.059
OPV5	first	MUSS	0.301
ORHI	first	MUSS	-0.075
P23	first	MUSS	0.085
P26	first	MUSS	0.28
P42	first	MUSS	-0.035
P65	first	MUSS	-0.009
P73	first	MUSS	-0.035
P75	first	MUSS	-0.134
PRCP	first	MUSS	-0.207
RIN	first	MUSS	-0.301
ROK	first	MUSS	-0.289
RR	first	MUSS	-0.104
S18	first	MUSS	-0.084
S23	first	MUSS	0.229
S301	first	MUSS	0.084
S302	first	MUSS	0.159
SAND	first	MUSS	-0.072
SILT	first	MUSS	0.723
SLP	first	MUSS	0.717
SN	first	MUSS	-0.15
SPLG	first	MUSS	0.506
TMX	first	MUSS	-0.331
WSX	first	MUSS	0.257
CHL	first	MUST	0.058
CHN	first	MUST	-0.068
CHS	first	MUST	-0.098
EMX	first	MUST	0.032
HSG	first	MUST	-0.326
LUN	first	MUST	-0.495
OC	first	MUST	0.017
OPV5	first	MUST	0.14
ORHI	first	MUST	-0.133
P23	first	MUST	-0.018
P26	first	MUST	0.066
P42	first	MUST	0.035
P65	first	MUST	0.019
P73	first	MUST	0.035
P75	first	MUST	-0.25
PRCP	first	MUST	-0.4
RIN	first	MUST	-0.284
ROK	first	MUST	-0.167
RR	first	MUST	-0.042
S18	first	MUST	-0.005
S23	first	MUST	0.294
S301	first	MUST	-0.131
S302	first	MUST	0.221
SAND	first	MUST	0.103
SILT	first	MUST	0.759
SLP	first	MUST	0.711
SN	first	MUST	-0.205
SPLG	first	MUST	0.613
TMX	first	MUST	-0.331
WSX	first	MUST	0.085
CHL	first	RUS2	0.506
CHN	first	RUS2	0.658
CHS	first	RUS2	0.668
EMX	first	RUS2	0.076
HSG	first	RUS2	-0.197
LUN	first	RUS2	-0.335
OC	first	RUS2	-0.135
OPV5	first	RUS2	0.109
ORHI	first	RUS2	-0.027
P23	first	RUS2	0.082
P26	first	RUS2	-0.214
P42	first	RUS2	0.035
P65	first	RUS2	-0.23
P73	first	RUS2	0.035
P75	first	RUS2	0.089
PRCP	first	RUS2	-0.568
RIN	first	RUS2	0.01
ROK	first	RUS2	-0.239
RR	first	RUS2	-0.168
S18	first	RUS2	0.003
S23	first	RUS2	0.069
S301	first	RUS2	0.106
S302	first	RUS2	0.315
SAND	first	RUS2	-0.187
SILT	first	RUS2	0.659
SLP	first	RUS2	0.787
SN	first	RUS2	0.37
SPLG	first	RUS2	0.052
TMX	first	RUS2	-0.476
WSX	first	RUS2	0.57
CHL	first	RUSL	0.041
CHN	first	RUSL	-0.029
CHS	first	RUSL	-0.024
EMX	first	RUSL	0.037
HSG	first	RUSL	0.07
LUN	first	RUSL	-0.136
OC	first	RUSL	-0.469
OPV5	first	RUSL	0.135
ORHI	first	RUSL	-0.04
P23	first	RUSL	0
P26	first	RUSL	-0.001
P42	first	RUSL	0.035
P65	first	RUSL	-0.082
P73	first	RUSL	0.035
P75	first	RUSL	0.118
PRCP	first	RUSL	-0.519
RIN	first	RUSL	-0.07
ROK	first	RUSL	0.197
RR	first	RUSL	0.023
S18	first	RUSL	-0.025
S23	first	RUSL	0.103
S301	first	RUSL	0.477
S302	first	RUSL	0.047
SAND	first	RUSL	0
SILT	first	RUSL	-0.067
SLP	first	RUSL	0.559
SN	first	RUSL	-0.04
SPLG	first	RUSL	0.562
TMX	first	RUSL	-0.348
WSX	first	RUSL	-0.021
CHL	first	USLE	-0.061
CHN	first	USLE	-0.051
CHS	first	USLE	0.018
EMX	first	USLE	0.032
HSG	first	USLE	-0.053
LUN	first	USLE	0.006
OC	first	USLE	-0.392
OPV5	first	USLE	0.16
ORHI	first	USLE	-0.014
P23	first	USLE	-0.01
P26	first	USLE	-0.102
P42	first	USLE	0.035
P65	first	USLE	-0.072
P73	first	USLE	0.035
P75	first	USLE	0.028
PRCP	first	USLE	-0.445
RIN	first	USLE	-0.062
ROK	first	USLE	0.125
RR	first	USLE	0.133
S18	first	USLE	0.145
S23	first	USLE	-0.114
S301	first	USLE	0.466
S302	first	USLE	0.112
SAND	first	USLE	-0.078
SILT	first	USLE	0.474
SLP	first	USLE	0.428
SN	first	USLE	-0.164
SPLG	first	USLE	0.525
TMX	first	USLE	-0.417
WSX	first	USLE	-0.115
CHL	total	AOF	0.003
CHN	total	AOF	0.08
CHS	total	AOF	0.015
EMX	total	AOF	0.1
HSG	total	AOF	-0.492
LUN	total	AOF	-0.55
OC	total	AOF	0.056
OPV5	total	AOF	0.138
ORHI	total	AOF	-0.082
P23	total	AOF	-0.135
P26	total	AOF	0.161
P42	total	AOF	-0.072
P65	total	AOF	0.017
P73	total	AOF	-0.072
P75	total	AOF	-0.154
PRCP	total	AOF	-0.362
RIN	total	AOF	-0.197
ROK	total	AOF	0.176
RR	total	AOF	0.333
S18	total	AOF	-0.234
S23	total	AOF	0.293
S301	total	AOF	-0.219
S302	total	AOF	-0.24
SAND	total	AOF	-0.075
SILT	total	AOF	0.135
SLP	total	AOF	0.764
SN	total	AOF	-0.041
SPLG	total	AOF	0.547
TMX	total	AOF	-0.265
WSX	total	AOF	0.166
CHL	total	MUSL	0.114
CHN	total	MUSL	0.213
CHS	total	MUSL	0.1
EMX	total	MUSL	0.127
HSG	total	MUSL	-0.434
LUN	total	MUSL	-0.492
OC	total	MUSL	0.106
OPV5	total	MUSL	0.045
ORHI	total	MUSL	-0.086
P23	total	MUSL	-0.139
P26	total	MUSL	0.111
P42	total	MUSL	-0.103
P65	total	MUSL	-0.198
P73	total	MUSL	-0.103
P75	total	MUSL	-0.129
PRCP	total	MUSL	-0.422
RIN	total	MUSL	-0.241
ROK	total	MUSL	0.256
RR	total	MUSL	0.386
S18	total	MUSL	-0.349
S23	total	MUSL	0.336
S301	total	MUSL	-0.195
S302	total	MUSL	-0.161
SAND	total	MUSL	0.061
SILT	total	MUSL	0.236
SLP	total	MUSL	0.761
SN	total	MUSL	-0.048
SPLG	total	MUSL	0.602
TMX	total	MUSL	-0.154
WSX	total	MUSL	0.216
CHL	total	MUSS	-0.161
CHN	total	MUSS	0.197
CHS	total	MUSS	-0.111
EMX	total	MUSS	0.169
HSG	total	MUSS	-0.415
LUN	total	MUSS	-0.475
OC	total	MUSS	0.103
OPV5	total	MUSS	0.126
ORHI	total	MUSS	-0.038
P23	total	MUSS	-0.137
P26	total	MUSS	0.267
P42	total	MUSS	0.05
P65	total	MUSS	-0.197
P73	total	MUSS	0.05
P75	total	MUSS	0.057
PRCP	total	MUSS	-0.546
RIN	total	MUSS	-0.18
ROK	total	MUSS	-0.03
RR	total	MUSS	0.213
S18	total	MUSS	-0.082
S23	total	MUSS	0.254
S301	total	MUSS	-0.136
S302	total	MUSS	-0.178
SAND	total	MUSS	-0.295
SILT	total	MUSS	-0.097
SLP	total	MUSS	0.688
SN	total	MUSS	-0.082
SPLG	total	MUSS	0.451
TMX	total	MUSS	-0.244
WSX	total	MUSS	0.404
CHL	total	MUST	0.065
CHN	total	MUST	0.257
CHS	total	MUST	0.102
EMX	total	MUST	0.117
HSG	total	MUST	-0.462
LUN	total	MUST	-0.529
OC	total	MUST	0.204
OPV5	total	MUST	0.145
ORHI	total	MUST	-0.079
P23	total	MUST	-0.105
P26	total	MUST	0.094
P42	total	MUST	-0.341
P65	total	MUST	-0.277
P73	total	MUST	-0.341
P75	total	MUST	-0.286
PRCP	total	MUST	-0.508
RIN	total	MUST	-0.199
ROK	total	MUST	0.154
RR	total	MUST	0.417
S18	total	MUST	-0.384
S23	total	MUST	0.344
S301	total	MUST	-0.242
S302	total	MUST	-0.185
SAND	total	MUST	-0.02
SILT	total	MUST	0.176
SLP	total	MUST	0.75
SN	total	MUST	-0.103
SPLG	total	MUST	0.594
TMX	total	MUST	-0.152
WSX	total	MUST	0.191
CHL	total	RUS2	0.463
CHN	total	RUS2	0.396
CHS	total	RUS2	0.521
EMX	total	RUS2	0.096
HSG	total	RUS2	-0.453
LUN	total	RUS2	-0.48
OC	total	RUS2	-0.169
OPV5	total	RUS2	-0.101
ORHI	total	RUS2	-0.13
P23	total	RUS2	-0.135
P26	total	RUS2	-0.224
P42	total	RUS2	0.172
P65	total	RUS2	-0.012
P73	total	RUS2	0.172
P75	total	RUS2	-0.225
PRCP	total	RUS2	-0.731
RIN	total	RUS2	0.145
ROK	total	RUS2	-0.236
RR	total	RUS2	0.176
S18	total	RUS2	0.238
S23	total	RUS2	0.363
S301	total	RUS2	-0.306
S302	total	RUS2	0.123
SAND	total	RUS2	-0.327
SILT	total	RUS2	-0.085
SLP	total	RUS2	0.814
SN	total	RUS2	0.513
SPLG	total	RUS2	0.433
TMX	total	RUS2	-0.445
WSX	total	RUS2	0.499
CHL	total	RUSL	0.034
CHN	total	RUSL	-0.042
CHS	total	RUSL	-0.036
EMX	total	RUSL	0.077
HSG	total	RUSL	0.283
LUN	total	RUSL	0.081
OC	total	RUSL	-0.424
OPV5	total	RUSL	0.094
ORHI	total	RUSL	-0.088
P23	total	RUSL	-0.093
P26	total	RUSL	0.205
P42	total	RUSL	-0.262
P65	total	RUSL	-0.194
P73	total	RUSL	-0.262
P75	total	RUSL	0.072
PRCP	total	RUSL	-0.507
RIN	total	RUSL	0.342
ROK	total	RUSL	-0.371
RR	total	RUSL	-0.011
S18	total	RUSL	0.131
S23	total	RUSL	0.068
S301	total	RUSL	0.029
S302	total	RUSL	-0.177
SAND	total	RUSL	0.033
SILT	total	RUSL	-0.184
SLP	total	RUSL	0.696
SN	total	RUSL	-0.042
SPLG	total	RUSL	0.496
TMX	total	RUSL	-0.315
WSX	total	RUSL	0.018
CHL	total	USLE	-0.076
CHN	total	USLE	-0.068
CHS	total	USLE	-0.298
EMX	total	USLE	-0.038
HSG	total	USLE	0.058
LUN	total	USLE	-0.023
OC	total	USLE	-0.681
OPV5	total	USLE	0.03
ORHI	total	USLE	-0.137
P23	total	USLE	-0.103
P26	total	USLE	0.071
P42	total	USLE	0.096
P65	total	USLE	-0.045
P73	total	USLE	0.096
P75	total	USLE	0.206
PRCP	total	USLE	-0.525
RIN	total	USLE	-0.009
ROK	total	USLE	-0.315
RR	total	USLE	-0.081
S18	total	USLE	0.103
S23	total	USLE	0.032
S301	total	USLE	0.026
S302	total	USLE	-0.347
SAND	total	USLE	-0.482
SILT	total	USLE	0.232
SLP	total	USLE	0.634
SN	total	USLE	0.007
SPLG	total	USLE	0.397
TMX	total	USLE	-0.302
WSX	total	USLE	-0.103

## Sheet: Table S5
Ref	Lat	Lon	Country	Erosion(t/ha)	Slope(%)	Precipitation(mm)	Soil	Method	Period(a)
Afshar_et_al_2010	32.0167	50.2167	Iran	29.8	25	600	loam	radioisotopic	NA
An_et_al_2014	45.7769	127.567	China	0.76	7	549	silt	radioisotopic	NA
Andrello_et_al_2003	-23.2667	-51.2833	Brazil	29	25	1615	clay	radioisotopic	NA
Andrello_et_al_2003	-23.2667	-51.2833	Brazil	0	5	1615	clay	radioisotopic	NA
Andrello_et_al_2004	-23.2667	-51.2833	Brazil	26.1	25	1526	clay	radioisotopic	NA
Andrello_et_al_2006	-30.097	-51.225	Brazil	0.24	12	1499	NA	radioisotopic	40
Andrello_et_al_2006	-30.097	-51.225	Brazil	25.97	12	1499	NA	radioisotopic	40
Andrello_et_al_2006	-30.097	-51.225	Brazil	3.25	12	1499	NA	radioisotopic	40
Andrello_et_al_2006	-30.097	-51.225	Brazil	229.95	12	1499	NA	radioisotopic	40
Andrello_et_al_2006	-30.097	-51.225	Brazil	11.81	12	1499	NA	radioisotopic	40
Andrello_et_al_2006	-30.097	-51.225	Brazil	229.95	12	1499	NA	radioisotopic	40
Andrello_et_al_2006	-30.097	-51.225	Brazil	9.03	12	1499	NA	radioisotopic	40
Bacchi_et_al_2000	-22.6667	-47.7833	Brazil	23	10	1254	NA	radioisotopic	NA
Bacchi_et_al_2003	-22.6483	-47.7611	Brazil	28	15	1261	sand	radioisotopic	NA
Bajracharya_et_al_1998	39.9167	-83.7833	United States of America	98.4333	2.5	995	loam	radioisotopic	NA
Bajracharya_et_al_1998	39.9167	-83.7833	United States of America	47.3	2.25	995	loam	radioisotopic	NA
Bajracharya_et_al_1998	39.9167	-83.7833	United States of America	93.4333	2.75	995	loam	radioisotopic	NA
Basher_and_Ross_2002	-37.2	174.9	New Zealand	30	13	1396	clay loam	radioisotopic	NA
Benmansour_et_al_2013	33.7833	-6.7	Morocco	17.9	17	405	clay	radioisotopic	NA
Bouhlassa_et_al_2000	35.3461	-5.37	Morocco	16.6	16	732	loam	radioisotopic	NA
Bouhlassa_et_al_2000	35.3461	-5.37	Morocco	31.1	16	732	loam	radioisotopic	NA
Bouhlassa_et_al_2000	35.3461	-5.37	Morocco	24.4	16	732	loam	radioisotopic	NA
Bouhlassa_et_al_2000	35.3461	-5.37	Morocco	37.5	16	732	loam	radioisotopic	NA
Brígido-Flores_et_al_1999	21.5	-77.7	Cuba	17.6	4.35	930	clay	radioisotopic	NA
Brígido-Flores_et_al_1999	21.5	-77.7	Cuba	30.2	4.35	930	clay	radioisotopic	NA
Brígido-Flores_et_al_1999	21.5	-77.7	Cuba	30.6	4.35	930	clay	radioisotopic	NA
Brígido-Flores_et_al_2002	21.5	-77.7	Cuba	7.3	3	930	clay	radioisotopic	NA
Brígido-Flores_et_al_2002	21.5	-77.7	Cuba	7.2	3	930	clay	radioisotopic	NA
Brígido-Flores_et_al_2002	21.5	-77.7	Cuba	12.4	3	930	clay	radioisotopic	NA
Bujan_et_al_2003	-33.8333	-59.8667	Argentina	22.56	0.785	1014	silt loam	radioisotopic	NA
Busacca_et_al_1993	NA	-116.983	United States of America	11.6	10.5	560	loam	radioisotopic	NA
Cao_et_al_1993	46.4	-71.0667	Canada	24.3	4	1166	NA	radioisotopic	NA
Cao_et_al_1993	46.4	-71.0667	Canada	12.9	4	1166	NA	radioisotopic	NA
Casali_et_al_2008	40.506	-0.716	Spain	5.609	14.8	725	NA	experimental plot	1
Casali_et_al_2008	40.506	-0.716	Spain	0.431	14.8	725	NA	experimental plot	1
Casali_et_al_2008	40.506	-0.716	Spain	0.236	14.8	725	NA	experimental plot	1
Casali_et_al_2008	40.506	-0.716	Spain	0.393	14.8	725	NA	experimental plot	1
Casali_et_al_2008	40.506	-0.716	Spain	0.042	14.8	725	NA	experimental plot	1
Casali_et_al_2008	40.506	-0.716	Spain	1.336	14.8	725	NA	experimental plot	1
Casali_et_al_2008	40.506	-0.716	Spain	1.377	14.8	725	NA	experimental plot	1
Casali_et_al_2008	40.527	-0.683	Spain	1.979	14.8	725	NA	experimental plot	9
Casali_et_al_2008	43.277	-2.879	Spain	0.701	19.3	835	NA	experimental plot	1
Casali_et_al_2008	43.277	-2.879	Spain	0.544	19.3	835	NA	experimental plot	1
Casali_et_al_2008	43.277	-2.879	Spain	0.009	19.3	835	NA	experimental plot	1
Casali_et_al_2008	43.277	-2.879	Spain	0.002	19.3	835	NA	experimental plot	1
Casali_et_al_2008	43.277	-2.879	Spain	0.048	19.3	835	NA	experimental plot	1
Casali_et_al_2008	43.277	-2.879	Spain	0.282	19.3	835	NA	experimental plot	1
Casali_et_al_2008	43.277	-2.879	Spain	0.042	19.3	835	NA	experimental plot	1
Casali_et_al_2008	43.277	-2.879	Spain	0.29	19.3	835	NA	experimental plot	9
Chambers_and_Garwood_2006	50.6	-3.54	United Kingdom	1.5	24.9328	1020	NA	experimental plot	4
Chambers_and_Garwood_2006	50.665	-3.336	United Kingdom	2.2	24.9328	872	NA	experimental plot	4
Chambers_and_Garwood_2006	51.9136	-2.52806	United Kingdom	0.8	44.5229	767	NA	experimental plot	4
Chambers_and_Garwood_2006	52.5492	-2.33574	United Kingdom	3.3	42.4475	856	NA	experimental plot	4
Chambers_and_Garwood_2006	51.007	-0.028	United Kingdom	3.4	24.9328	769	NA	experimental plot	4
Chambers_and_Garwood_2006	50.6654	-3.4958	United Kingdom	0.88	28.6745	829	NA	experimental plot	2
Chambers_and_Garwood_2006	51.529	-3.189	United Kingdom	3.9	23.0868	1065	NA	experimental plot	4
Chambers_and_Garwood_2006	52.6173	-1.72816	United Kingdom	10.3	24.9328	673	NA	experimental plot	4
Chambers_and_Garwood_2006	52.4525	-2.3202	United Kingdom	0.72	26.7949	1040	NA	experimental plot	4
Chambers_and_Garwood_2006	51.9605	-2.62882	United Kingdom	11	23.0868	719	NA	experimental plot	4
Chambers_and_Garwood_2006	50.627	-3.45059	United Kingdom	8.5	17.6327	809	NA	experimental plot	4
Chartin_et_al_2013	47.002	0.003	France	0.2	4.4	600	NA	radioisotopic	NA
Chartin_et_al_2014	47.002	0.003	France	4.5	4.4	600	NA	radioisotopic	NA
Collins_et_al_2001	-16.1833	28.0333	Zambia	7	6.25	830	clay	radioisotopic	NA
Collins_et_al_2001	-16.1833	28.0333	Zambia	7	6.25	830	clay	radioisotopic	NA
Correchel_et_al_2006	-22.15	-47.0167	Brazil	39	13	1400	clay	radioisotopic	NA
Correchel_et_al_2006	-22.15	-47.0167	Brazil	33	13	1400	clay	radioisotopic	NA
Correchel_et_al_2006	-22.15	-47.0167	Brazil	39	13	1400	clay	radioisotopic	NA
Correchel_et_al_2006	-22.15	-47.0167	Brazil	42	13	1400	clay	radioisotopic	NA
Correchel_et_al_2006	-22.15	-47.0167	Brazil	34	13	1400	clay	radioisotopic	NA
Correchel_et_al_2006	-22.15	-47.0167	Brazil	37	13	1400	clay	radioisotopic	NA
Correchel_et_al_2006	-22.15	-47.0167	Brazil	39	13	1400	clay	radioisotopic	NA
Correchel_et_al_2006	-22.15	-47.0167	Brazil	34	13	1400	clay	radioisotopic	NA
Correchel_et_al_2006	-22.15	-47.0167	Brazil	25	10	1400	clay	radioisotopic	NA
Correchel_et_al_2006	-22.15	-47.0167	Brazil	22	10	1400	clay	radioisotopic	NA
Correchel_et_al_2006	-22.15	-47.0167	Brazil	32	10	1400	clay	radioisotopic	NA
Correchel_et_al_2006	-22.15	-47.0167	Brazil	28	10	1400	clay	radioisotopic	NA
Correchel_et_al_2006	-22.15	-47.0167	Brazil	32	10	1400	clay	radioisotopic	NA
Correchel_et_al_2006	-22.15	-47.0167	Brazil	9	10	1400	clay	radioisotopic	NA
Correchel_et_al_2006	-22.15	-47.0167	Brazil	22	10	1400	clay	radioisotopic	NA
Correchel_et_al_2006	-22.15	-47.0167	Brazil	30	10	1400	clay	radioisotopic	NA
Correchel_et_al_2006	-22.15	-47.0167	Brazil	39	10	1400	clay	radioisotopic	NA
Correchel_et_al_2006	-22.15	-47.0167	Brazil	28	10	1400	clay	radioisotopic	NA
Correchel_et_al_2006	-22.15	-47.0167	Brazil	39	10	1400	clay	radioisotopic	NA
Correchel_et_al_2006	-22.15	-47.0167	Brazil	33	10	1400	clay	radioisotopic	NA
Correchel_et_al_2006	-22.15	-47.0167	Brazil	25	10	1400	clay	radioisotopic	NA
Correchel_et_al_2006	-22.15	-47.0167	Brazil	31	10	1400	clay	radioisotopic	NA
Correchel_et_al_2006	-22.15	-47.0167	Brazil	15	6.5	1400	clay	radioisotopic	NA
Correchel_et_al_2006	-22.15	-47.0167	Brazil	1	6.5	1400	clay	radioisotopic	NA
Correchel_et_al_2006	-22.15	-47.0167	Brazil	4	6.5	1400	clay	radioisotopic	NA
Correchel_et_al_2006	-22.15	-47.0167	Brazil	20	6.5	1400	clay	radioisotopic	NA
Correchel_et_al_2006	-22.003	-47	Brazil	31	13	1400	NA	experimental plot	60
Correchel_et_al_2006	-22.003	-47	Brazil	40	13	1400	NA	experimental plot	60
Correchel_et_al_2006	-22.003	-47	Brazil	37	13	1400	NA	experimental plot	60
Correchel_et_al_2006	-22.003	-47	Brazil	34	13	1400	NA	experimental plot	60
Correchel_et_al_2006	-22.003	-47	Brazil	39	13	1400	NA	experimental plot	60
Correchel_et_al_2006	-22.003	-47	Brazil	28	13	1400	NA	experimental plot	60
Correchel_et_al_2006	-22.003	-47	Brazil	33	13	1400	NA	experimental plot	60
Correchel_et_al_2006	-22.003	-47	Brazil	29	13	1400	NA	experimental plot	60
Correchel_et_al_2006	-22.003	-47	Brazil	16	10	1400	NA	experimental plot	60
Correchel_et_al_2006	-22.003	-47	Brazil	24	10	1400	NA	experimental plot	60
Correchel_et_al_2006	-22.003	-47	Brazil	25	10	1400	NA	experimental plot	60
Correchel_et_al_2006	-22.003	-47	Brazil	23	10	1400	NA	experimental plot	60
Correchel_et_al_2006	-22.003	-47	Brazil	35	10	1400	NA	experimental plot	60
Correchel_et_al_2006	-22.003	-47	Brazil	15	10	1400	NA	experimental plot	60
Correchel_et_al_2006	-22.003	-47	Brazil	17	10	1400	NA	experimental plot	60
Correchel_et_al_2006	-22.003	-47	Brazil	19	10	1400	NA	experimental plot	60
Correchel_et_al_2006	-22.003	-47	Brazil	54	10	1400	NA	experimental plot	60
Correchel_et_al_2006	-22.003	-47	Brazil	20	10	1400	NA	experimental plot	60
Correchel_et_al_2006	-22.003	-47	Brazil	30	10	1400	NA	experimental plot	60
Correchel_et_al_2006	-22.003	-47	Brazil	23	10	1400	NA	experimental plot	60
Correchel_et_al_2006	-22.003	-47	Brazil	13	10	1400	NA	experimental plot	60
Damnati_et_al_2013	35.5322	-5.83167	Morocco	32	25	800	clay	radioisotopic	NA
Damnati_et_al_2013	35.5322	-5.83167	Morocco	29	25	800	clay	radioisotopic	NA
Damnati_et_al_2013	35.7306	-5.5	Morocco	13.9	39	790.5	clay	radioisotopic	NA
Damnati_et_al_2013	35.7306	-5.5	Morocco	12.2	38.3864	790.5	clay	radioisotopic	NA
Damnati_et_al_2013	35.3461	-5.37	Morocco	33.1	36	800	clay	radioisotopic	NA
Damnati_et_al_2013	35.3461	-5.37	Morocco	41.3	40	800	clay	radioisotopic	NA
Estrany_et_al_2010	39.5667	3.2	Spain	0.26	17.1	575	clay loam	radioisotopic	NA
Estrany_et_al_2010	39.5667	3.2	Spain	2.64	11.3	520	sandy clay	radioisotopic	NA
Estrany_et_al_2010	39.5667	3.2	Spain	1.49	7	520	sandy clay loam	radioisotopic	NA
Estrany_et_al_2010	39.5667	3.2	Spain	2	9.8	685	sandy clay loam	radioisotopic	NA
Estrany_et_al_2010	39.5667	3.2	Spain	0.47	10.9	685	sandy clay loam	radioisotopic	NA
Fang_et_al_2006	44.7167	125.867	China	18.9	5	528	clay loam	radioisotopic	NA
Fang_et_al_2006	44.7167	125.867	China	24	5	528	clay loam	radioisotopic	NA
Fang_et_al_2006	44.7167	125.867	China	24	5	528	clay loam	radioisotopic	NA
Fang_et_al_2012	48.9333	125.183	China	2.2	4.4	496	loam	radioisotopic	NA
Fornes_et_al_2005	41.2311	-95.6067	United States of America	34	8	824	loam	radioisotopic	NA
Forsyth_1994	20.1667	99.75	Thailand	27.9	20	1500	NA	radioisotopic	NA
Forsyth_1994	20.1667	99.75	Thailand	63.8	20	1500	NA	radioisotopic	NA
Fulajtar_2003	48.5411	17.6325	Slovakia	22.4	9.5	586	loam	radioisotopic	NA
Fulajtar_2003	48.5411	17.6325	Slovakia	35.6	9.5	586	loam	radioisotopic	NA
Fulajtar_2003	48.5411	17.6325	Slovakia	17.3	9.5	586	loam	radioisotopic	NA
Gafur_et_al_2003	NA	NA	Bangladesh	23.34	19	3045	NA	experimental plot	1
Gafur_et_al_2003	NA	NA	Bangladesh	7.88	19	3045	NA	experimental plot	1
Gafur_et_al_2003	NA	NA	Bangladesh	2.9	19	3123	NA	experimental plot	1
Ganna_2000	10.75	-0.5	Ghana	14.6	2.575	981	NA	radioisotopic	NA
Garcia_Oliva_et_al_1995	19.4833	-105.017	Mexico	13.4	3.5	748	loam	radioisotopic	NA
Garcia_Oliva_et_al_1995	19.4833	-105.017	Mexico	13.5	43	748	loam	radioisotopic	NA
Garcia_Oliva_et_al_1995	19.4833	-105.017	Mexico	3.9	19.6	748	loam	radioisotopic	NA
Garcia_Oliva_et_al_1995	19.4833	-105.017	Mexico	6.6	3.5	748	loam	radioisotopic	NA
Garcia_Oliva_et_al_1995	19.4833	-105.017	Mexico	3.6	43	748	loam	radioisotopic	NA
Garcia_Oliva_et_al_1995	19.4833	-105.017	Mexico	11.1	3.5	748	loam	radioisotopic	NA
Garcia_Oliva_et_al_1995	19.4833	-105.017	Mexico	12	43	748	loam	radioisotopic	NA
Garcia_Oliva_et_al_1995	19.4833	-105.017	Mexico	12.7	19.6	748	loam	radioisotopic	NA
Garcia_Oliva_et_al_1995	19.4833	-105.017	Mexico	2.3	3.5	748	loam	radioisotopic	NA
Garcia_Oliva_et_al_1995	19.4833	-105.017	Mexico	10.9	43	748	loam	radioisotopic	NA
Garcia_Oliva_et_al_1995	19.4833	-105.017	Mexico	23.2	19.6	748	loam	radioisotopic	NA
Gaspar_et_al_2013	42.0417	0.525	Spain	14.65	15	500	silt loam	radioisotopic	NA
Gharibreza_et_al_2013	3.16667	102.783	Malaysia	117	4.5	1801	loam	radioisotopic	NA
Gharibreza_et_al_2013	2.88333	102.508	Malaysia	70	4.5	1801	loam	radioisotopic	NA
Gimenez_et_al_2012	42.618	-1.621	Spain	0.457	14.8	724	NA	experimental plot	15
Gimenez_et_al_2012	42.805	-1.67	Spain	1.833	19.3	830	NA	experimental plot	15
Hai_et_al_2011	11.5833	108.05	Viet Nam	22.6	25	2590	clay	radioisotopic	NA
Hai_et_al_2011	11.5833	107.8	Viet Nam	31	15	2590	NA	radioisotopic	NA
Häring_et_al_2014	21.0317	104.299	Viet Nam	34.5	48.5	1259	clay	radioisotopic	NA
Häring_et_al_2014	21.0317	104.299	Viet Nam	43	54	1259	clay	radioisotopic	NA
Häring_et_al_2014	21.0317	104.299	Viet Nam	70.8	43.5	1259	clay	radioisotopic	NA
Hassouni_and_Bouhlassa_2006	35.4	-5.36667	Morocco	17.5	35	742	silt	radioisotopic	NA
Hassouni_and_Bouhlassa_2006	35.4	-5.36667	Morocco	11.55	27	742	silt	radioisotopic	NA
Hassouni_and_Bouhlassa_2006	35.4	-5.36667	Morocco	8	28	742	silt	radioisotopic	NA
Hassouni_and_Bouhlassa_2006	35.4	-5.36667	Morocco	6.72	29	742	silt	radioisotopic	NA
Hassouni_and_Bouhlassa_2006	35.4	-5.36667	Morocco	7.25	32	742	silt	radioisotopic	NA
Hassouni_and_Bouhlassa_2006	35.4	-5.36667	Morocco	31.84	35	742	silt	radioisotopic	NA
Hassouni_and_Bouhlassa_2006	35.4	-5.36667	Morocco	19.575	27	742	silt	radioisotopic	NA
Hassouni_and_Bouhlassa_2006	35.4	-5.36667	Morocco	12.7667	28	742	silt	radioisotopic	NA
Hassouni_and_Bouhlassa_2006	35.4	-5.36667	Morocco	10.22	29	742	silt	radioisotopic	NA
Hassouni_and_Bouhlassa_2006	35.4	-5.36667	Morocco	11.15	32	742	silt	radioisotopic	NA
Hassouni_and_Bouhlassa_2006	35.4	-5.36667	Morocco	25.4	35.2156	742	silt	radioisotopic	NA
Hassouni_and_Bouhlassa_2006	35.4	-5.36667	Morocco	15.65	26.6079	742	silt	radioisotopic	NA
Hassouni_and_Bouhlassa_2006	35.4	-5.36667	Morocco	9.73333	28.2971	742	silt	radioisotopic	NA
Hassouni_and_Bouhlassa_2006	35.4	-5.36667	Morocco	7.92	29.242	742	silt	radioisotopic	NA
Hassouni_and_Bouhlassa_2006	35.4	-5.36667	Morocco	8.85	32.1065	742	silt	radioisotopic	NA
Iurian_et_al_2013	46.6	24.1	Romania	5.2	7.75	583	NA	radioisotopic	NA
Iurian_et_al_2013	46.6	24.1	Romania	4.15	7.95	583	NA	radioisotopic	NA
Iurian_et_al_2013	46.6	24.1	Romania	8.7	7.75	583	NA	radioisotopic	NA
Iurian_et_al_2013	46.6	24.1	Romania	4.25	8	583	NA	radioisotopic	NA
Jia_et_al_2012	34.3761	105.816	China	26.43	17.6	648	NA	radioisotopic	NA
Jia_et_al_2012	34.3519	105.331	China	64.19	42.45	649	NA	radioisotopic	NA
Jia_et_al_2012	33.8006	105.465	China	37.28	30.6	649	sand	radioisotopic	NA
Jia_et_al_2012	33.6794	105.567	China	46.06	36.4	650	sand	radioisotopic	NA
Jia_et_al_2012	33.6517	105.659	China	47.13	39.4	676	sand	radioisotopic	NA
Jia_et_al_2012	33.5953	105.762	China	37.94	32.5	669	sand	radioisotopic	NA
Junge_et_al_2010	7.83333	4.48333	Nigeria	18.3	10.5	1277	sand	radioisotopic	NA
Kabanza_et_al_2013	-6.033	39.217	United Republic of Tanzania	1.6	2	823	NA	experimental plot	1
Kabanza_et_al_2013	-6.033	39.217	United Republic of Tanzania	1.1	2	823	NA	experimental plot	1
Kabanza_et_al_2013	-6.033	39.217	United Republic of Tanzania	1.7	2	823	NA	experimental plot	1
Kabanza_et_al_2013	-6.033	39.217	United Republic of Tanzania	1	2	823	NA	experimental plot	1
Kabanza_et_al_2013	-6.033	39.217	United Republic of Tanzania	0.8	2	823	NA	experimental plot	1
Kabanza_et_al_2013	-6.033	39.217	United Republic of Tanzania	2.8	2	823	NA	experimental plot	1
Kabanza_et_al_2013	-6.033	39.217	United Republic of Tanzania	0.4	2	823	NA	experimental plot	1
Kabanza_et_al_2013	-6.033	39.217	United Republic of Tanzania	0.4	2	823	NA	experimental plot	1
Kabanza_et_al_2013	-6.033	39.217	United Republic of Tanzania	1.4	2	823	NA	experimental plot	1
Kabanza_et_al_2013	-6.033	39.217	United Republic of Tanzania	0.09	2	823	NA	experimental plot	1
Kabanza_et_al_2013	-6.033	39.217	United Republic of Tanzania	0.02	2	823	NA	experimental plot	1
Kabanza_et_al_2013	-6.033	39.217	United Republic of Tanzania	0.19	2	823	NA	experimental plot	1
Kabanza_et_al_2013	-10.7167	39.2	United Republic of Tanzania	79	15	1137	NA	experimental plot	1
Kabanza_et_al_2013	-10.7167	39.2	United Republic of Tanzania	126	15	1137	NA	experimental plot	1
Kabanza_et_al_2013	-10.7167	39.2	United Republic of Tanzania	285	15	1137	NA	experimental plot	1
Kabanza_et_al_2013	-10.7167	39.2	United Republic of Tanzania	26	15	1137	NA	experimental plot	1
Kabanza_et_al_2013	-10.7167	39.2	United Republic of Tanzania	27	15	1137	NA	experimental plot	1
Kabanza_et_al_2013	-10.7167	39.2	United Republic of Tanzania	159	15	1137	NA	experimental plot	1
Kabanza_et_al_2013	-10.7167	39.2	United Republic of Tanzania	26	15	1137	NA	experimental plot	1
Kabanza_et_al_2013	-10.7167	39.2	United Republic of Tanzania	65	15	1137	NA	experimental plot	1
Kabanza_et_al_2013	-10.7167	39.2	United Republic of Tanzania	132	15	1137	NA	experimental plot	1
Kabanza_et_al_2013	-10.7167	39.2	United Republic of Tanzania	9.2	15	1137	NA	experimental plot	1
Kabanza_et_al_2013	-10.7167	39.2	United Republic of Tanzania	38	15	1137	NA	experimental plot	1
Kabanza_et_al_2013	-10.7167	39.2	United Republic of Tanzania	60	15	1137	NA	experimental plot	1
Lacoste_et_al_2014	48.5333	-1.56667	France	7.61	3.3	715	NA	radioisotopic	NA
Lacoste_et_al_2014	48.5333	-1.56667	France	13.88	3.3	715	NA	radioisotopic	NA
Lacoste_et_al_2014	48.5333	-1.56667	France	65.7	3	715	NA	radioisotopic	NA
Lacoste_et_al_2014	48.5333	-1.56667	France	5.94	3	715	NA	radioisotopic	NA
Lacoste_et_al_2014	48.5333	-1.56667	France	13.83	1.3	715	NA	radioisotopic	NA
Lacoste_et_al_2014	48.5333	-1.56667	France	13.44	1.3	715	NA	radioisotopic	NA
Lacoste_et_al_2014	48.5333	-1.56667	France	2.47	6.9	715	NA	radioisotopic	NA
Lacoste_et_al_2014	48.5333	-1.56667	France	20.7	6.5	715	NA	radioisotopic	NA
Lacoste_et_al_2014	48.5333	-1.56667	France	10.05	4	715	NA	radioisotopic	NA
Lacoste_et_al_2014	48.5333	-1.56667	France	5.25	4	715	NA	radioisotopic	NA
Li_and_Lindstrom_2001	36.7	109.517	China	13	5.85	512	silt loam	radioisotopic	NA
Li_and_Lindstrom_2001	36.7	109.517	China	16.5	5.85	512	silt loam	radioisotopic	NA
Li_and_Lindstrom_2001	36.7	109.517	China	35.5	15.9	512	silt loam	radioisotopic	NA
Li_and_Lindstrom_2001	36.7	109.517	China	14	11.55	512	silt loam	radioisotopic	NA
Li_et_al_2003	36.7	109.517	China	50	37.65	512	silt loam	radioisotopic	NA
Li_et_al_2003	36.7	109.517	China	25.5	37.65	512	silt loam	radioisotopic	NA
Li_et_al_2011	43.05	-80.3667	Canada	27	14	909	sandy loam	radioisotopic	NA
Li_et_al_2011	43.05	-80.3667	Canada	6	14	909	sandy loam	radioisotopic	NA
Loughran_and_Elliott_1996	-33.7	136.483	Australia	8.16	7	400	loam	radioisotopic	NA
Loughran_and_Elliott_1996	-33.7	136.483	Australia	0.4	7	400	loam	radioisotopic	NA
Loughran_and_Elliott_1996	-33.7	136.483	Australia	1.48	7	400	loam	radioisotopic	NA
Loughran_and_Elliott_1996	-33.2053	138.602	Australia	0	7	464	loam	radioisotopic	NA
Loughran_and_Elliott_1996	-33.2053	138.602	Australia	0.72	7	464	loam	radioisotopic	NA
Loughran_and_Elliott_1996	-33.2053	138.602	Australia	0.2	7	464	loam	radioisotopic	NA
Loughran_and_Elliott_1996	-33.4833	138.6	Australia	0.57	7	442	loam	radioisotopic	NA
Loughran_and_Elliott_1996	-33.2739	138.59	Australia	0.26	7	450	loam	radioisotopic	NA
Loughran_and_Elliott_1996	-33.2267	138.887	Australia	0.64	7	344	loam	radioisotopic	NA
Loughran_and_Elliott_1996	-33.9167	138.717	Australia	1.34	7	550	loam	radioisotopic	NA
Loughran_and_Elliott_1996	-34.0833	138.783	Australia	1.25	7	496	loam	radioisotopic	NA
Loughran_and_Elliott_1996	-34.3389	138.917	Australia	1.98	7	494	loam	radioisotopic	NA
Loughran_and_Elliott_1996	-34.95	138.883	Australia	2.56	7	821	loam	radioisotopic	NA
Loughran_and_Elliott_1996	-34.95	138.883	Australia	12.8	7	821	loam	radioisotopic	NA
Loughran_and_Elliott_1996	-35.2667	138.9	Australia	3	7	495	loam	radioisotopic	NA
Loughran_et_al_1988	-32.15	150.35	Australia	1.53263	10.5	590	silt	radioisotopic	NA
Lu_and_Higgitt_2000	29.15	107	China	45.59	51	1031	NA	radioisotopic	NA
Mabit_et_al_2007	46.7667	-70.95	Canada	5	2	1175	sandy loam	radioisotopic	NA
Mabit_et_al_2007	46.7667	-70.95	Canada	3.6	2	1175	sandy clay loam	radioisotopic	NA
Mabit_et_al_2007	46.7667	-70.95	Canada	2.7	2	1175	sandy clay loam	radioisotopic	NA
Mabit_et_al_2009	48.5833	16.5833	Austria	26.1	14	643	silt loam	radioisotopic	NA
Mabit_et_al_2009	48.5833	16.5833	Austria	50.5	14	643	silt loam	radioisotopic	NA
Mabit_et_al_2009	48.5833	16.5833	Austria	20.3	14	643	silt loam	radioisotopic	NA
Mabit_et_al_2009	48.5833	16.5833	Austria	13.5	14	643	silt loam	radioisotopic	NA
Mabit_et_al_2009	48.5833	16.5833	Austria	13.2	14	643	silt loam	radioisotopic	NA
Mabit_et_al_2014	33.7833	-6.7	Morocco	15.4	17.6	461	clay	radioisotopic	NA
Menzel_et_al_1987	37.25	127.5	Korea	27	11	1307	clay loam	radioisotopic	NA
Menzel_et_al_1987	37.25	127.5	Korea	33	11	1307	sandy loam	radioisotopic	NA
Menzel_et_al_1987	37.25	127.5	Korea	20	8	1307	sandy loam	radioisotopic	NA
Menzel_et_al_1987	37.25	127.5	Korea	18	8	1307	sandy loam	radioisotopic	NA
Menzel_et_al_1987	37.25	127.5	Korea	4	10	1307	sandy loam	radioisotopic	NA
Menzel_et_al_1987	37.25	127.5	Korea	4	10	1307	sandy loam	radioisotopic	NA
Menzel_et_al_1987	36.75	126.833	Korea	25	17	1254	sandy loam	radioisotopic	NA
Menzel_et_al_1987	36.75	126.833	Korea	4	17	1254	loam	radioisotopic	NA
Menzel_et_al_1987	35.5	128.667	Korea	0.1	20	1221	sandy loam	radioisotopic	NA
Menzel_et_al_1987	35.5	128.667	Korea	0.1	20	1221	sandy loam	radioisotopic	NA
Menzel_et_al_1987	35.5	128.667	Korea	12	18	1221	clay loam	radioisotopic	NA
Menzel_et_al_1987	35.5	128.667	Korea	4	18	1221	clay loam	radioisotopic	NA
Menzel_et_al_1987	37.25	126.833	Korea	15	26	1272	clay loam	radioisotopic	NA
Menzel_et_al_1987	37.25	126.833	Korea	18	13	1272	sandy loam	radioisotopic	NA
Menzel_et_al_1987	37.25	126.833	Korea	13	5	1272	clay loam	radioisotopic	NA
Merten_and_Minella_2006	-29.389	-54.188	Brazil	0.7294	9	2219.6	NA	experimental plot	1
Merten_and_Minella_2006	-29.47	-54.167	Brazil	0.9114	9	1835.3	NA	experimental plot	1
Merten_et_al_2010	-29.181	-50.729	Brazil	4.294	9	1751	NA	experimental plot	1
Merten_et_al_2010	-29.316	-50.729	Brazil	3.141	9	1751	NA	experimental plot	2
Merten_et_al_2010	-29.316	-50.729	Brazil	1.382	9	1751	NA	experimental plot	1
Nadal_Romero_et_al_2013	42.447	-0.67	Spain	3.785	32	1216.7	NA	experimental plot	15
Nadal_Romero_et_al_2013	42.447	-0.67	Spain	4.373	32	1216.7	NA	experimental plot	15
Nagle_and_Ritchie_2004	45.6869	-118.74	United States of America	3	5	430	silt loam	radioisotopic	NA
Nagle_and_Ritchie_2004	45.6869	-118.74	United States of America	6.6	12	500	silt loam	radioisotopic	NA
Nagle_et_al_2000	18.75	-70.2167	Dominican Republic	33	55	1375	NA	radioisotopic	NA
Nagle_et_al_2000	18.75	-70.2167	Dominican Republic	17.9	45	1375	NA	radioisotopic	NA
Nagle_et_al_2000	18.75	-70.2167	Dominican Republic	27.1	23	1375	NA	radioisotopic	NA
Nagle_et_al_2000	18.75	-70.2167	Dominican Republic	14.3	55	1375	NA	radioisotopic	NA
Nagle_et_al_2000	18.75	-70.2167	Dominican Republic	34.3	50	1375	NA	radioisotopic	NA
Nagle_et_al_2000	18.75	-70.2167	Dominican Republic	53	37	1375	NA	radioisotopic	NA
Nagle_et_al_2000	18.75	-70.2167	Dominican Republic	61.6	25	1375	NA	radioisotopic	NA
Nagle_et_al_2000	18.75	-70.2167	Dominican Republic	26.5	38	1375	NA	radioisotopic	NA
Navas_et_al_2013	42.0417	0.525	Spain	17.3	24	595	silt loam	radioisotopic	NA
Navas_et_al_2013	42.0417	0.525	Spain	40.3	24	595	silt loam	radioisotopic	NA
Nouira_et_al_2003	33.6167	-7.41667	Morocco	55	9	400	clay	radioisotopic	NA
Nouira_et_al_2003	33.6167	-7.41667	Morocco	22	9	400	clay	radioisotopic	NA
Nouira_et_al_2003	33.6167	-7.41667	Morocco	39	9	400	clay	radioisotopic	NA
Nouira_et_al_2003	33.6167	-7.41667	Morocco	35	9	400	clay	radioisotopic	NA
Nouira_et_al_2003	33.6167	-7.41667	Morocco	28	9	400	clay	radioisotopic	NA
Oeurng_et_al_2010	43.952	1.073	France	0.15	3.6	603	NA	experimental plot	1
Oeurng_et_al_2010	43.908	1.095	France	0.7	3.6	787	NA	experimental plot	1
Poreba_et_al_2006	50.4	18.4	Poland	24	17.6327	675	loam	radioisotopic	NA
Porto_and_Walling_2012	38.265	15.8136	Italy	10.75	10	1100	silt loam	radioisotopic	NA
Porto_et_al_2011	39.372	17.029	Italy	0.11	8.4	712	NA	experimental plot	15
Porto_et_al_2011	39.384	16.98	Italy	0.21	8.4	713	NA	experimental plot	15
Porto_et_al_2014	37.47	14.7347	Italy	49	28	500	silt loam	radioisotopic	NA
Quijano_et_al_2016	42.0283	-1	Spain	19.7	7.82	500	NA	radioisotopic	NA
Quine_et_al_1992	31.2244	105.381	China	22.1	36	1000	NA	radioisotopic	NA
Quine_et_al_1992	31.2244	105.381	China	18.2	36	1000	NA	radioisotopic	NA
Quine_et_al_1992	31.2244	105.381	China	34.5	36	1000	NA	radioisotopic	NA
Quine_et_al_1992	31.2244	105.381	China	54.3	36	1000	NA	radioisotopic	NA
Quine_et_al_1992	31.2244	105.381	China	61.9	36	1000	NA	radioisotopic	NA
Quine_et_al_1992	31.2244	105.381	China	43.6	36	1000	NA	radioisotopic	NA
Quine_et_al_1992	31.2244	105.381	China	53.5	36	1000	NA	radioisotopic	NA
Quine_et_al_1993	-17.75	31.0833	Zimbabwe	15	3.1	885	clay loam	radioisotopic	NA
Quine_et_al_1993	-17.75	31.0833	Zimbabwe	20.6	3.5	885	clay loam	radioisotopic	NA
Quine_et_al_1993	-17.6167	31.25	Zimbabwe	27.7	6.5	890	NA	radioisotopic	NA
Quine_et_al_1993	-17.6167	31.25	Zimbabwe	36.2	3.3	890	NA	radioisotopic	NA
Quine_et_al_1993	-17.6167	31.25	Zimbabwe	26.3	11	890	NA	radioisotopic	NA
Quine_et_al_1993	-17.6167	31.25	Zimbabwe	24.1	2.1	890	NA	radioisotopic	NA
Quine_et_al_1993	-17.6167	31.25	Zimbabwe	26.45	3.8	890	NA	radioisotopic	NA
Quine_et_al_1997	36.9733	109.196	China	51	20	465	loam	radioisotopic	NA
Quine_et_al_1999	31.2244	105.381	China	51.5	10.9	997	loam	radioisotopic	NA
Quine_et_al_1999	-29.3625	27.6319	Lesotho	32.5	6.6	716	loam	radioisotopic	NA
Quine_et_al_1999	-17.8497	30.9928	Zimbabwe	9.1	5.6	801	sand	radioisotopic	NA
Rabesiranana_et_al_2016	-18.9106	47.7783	Madagascar	8.2	19.8	1460	clay	radioisotopic	NA
Rijsdijk_et_al_2007	-7.663	112.307	Indonesia	87	12	3305	NA	experimental plot	1
Ruecker_et_al_2008	1.26667	34.75	Uganda	22.9	10	2000	clay	radioisotopic	NA
Ruecker_et_al_2008	0.533333	33.4667	Uganda	9.3	3	1319	clay	radioisotopic	NA
Sac_and_Ichedef_2015	38.5578	28.0794	Turkey	16.58	7	755	NA	radioisotopic	NA
Sac_and_Ichedef_2015	38.5722	28.1131	Turkey	18.25	6	755	NA	radioisotopic	NA
Sac_and_Ichedef_2015	38.5239	28.0931	Turkey	16.02	8	755	NA	radioisotopic	NA
Sac_and_Ichedef_2015	38.5517	28.1575	Turkey	19.4	10	755	NA	radioisotopic	NA
Sac_and_Ichedef_2015	38.5578	28.0794	Turkey	17.52	7	755	NA	radioisotopic	NA
Sac_and_Ichedef_2015	38.5722	28.1131	Turkey	18.22	6	755	NA	radioisotopic	NA
Sac_and_Ichedef_2015	38.5239	28.0931	Turkey	18.26	8	755	NA	radioisotopic	NA
Sac_and_Ichedef_2015	38.5517	28.1575	Turkey	21.1	10	755	NA	radioisotopic	NA
Sac_et_al_2008	38.5603	27.9408	Turkey	22.2	20	755	NA	radioisotopic	NA
Sac_et_al_2008	38.5603	27.9408	Turkey	25.6	20	755	NA	radioisotopic	NA
Sadiki_et_al_2007	34.5017	-3.64278	Morocco	34.0429	24.1925	250	NA	radioisotopic	NA
Sadiki_et_al_2007	34.5017	-3.64278	Morocco	10.6333	17.6327	250	NA	radioisotopic	NA
Sadiki_et_al_2007	34.5017	-3.64278	Morocco	19.4167	17.6327	250	NA	radioisotopic	NA
Schimmack_et_al_2002	48.5	11.45	Germany	37	20	822	loam	radioisotopic	NA
Schuller_and_Walling_2014	-38.6667	-72.5	Chile	12.7	10	1600	clay	radioisotopic	NA
Schuller_and_Walling_2014	-38.6667	-72.5	Chile	9.3	7.8	1600	clay	radioisotopic	NA
Schuller_et_al_2000	-38.6667	-72.5	Chile	7.9	10.7	1160	NA	radioisotopic	NA
Schuller_et_al_2000	-38.6667	-72.5	Chile	6.9	10.7	1160	NA	radioisotopic	NA
Schuller_et_al_2000	-38.6667	-72.5	Chile	10.3	10.7	1160	NA	radioisotopic	NA
Schuller_et_al_2000	-38.6667	-72.5	Chile	6.5	10.7	1160	NA	radioisotopic	NA
Shi_et_al_2012	29.5833	105.067	China	31.9	18.5	1101	NA	radioisotopic	NA
Shi_et_al_2012	31.2111	108.407	China	34.6	25	1241	NA	radioisotopic	NA
Shi_et_al_2012	31.2111	108.407	China	71.3	55.4	1241	NA	radioisotopic	NA
Shi_et_al_2012	30.3283	108.047	China	13	20	1278	NA	radioisotopic	NA
Sparovek_et_al_2000	-22.6483	-47.7611	Brazil	28	16	1261	sand	radioisotopic	NA
Su_and_Zhang_2010	30.001	107.009	China	90.93	27.63	1150	NA	radioisotopic	NA
Su_and_Zhang_2010	30.001	107.009	China	52.8	14.52	1150	NA	radioisotopic	NA
Su_and_Zhang_2010	30.001	107.009	China	44.75	12.63	1150	NA	radioisotopic	NA
Su_and_Zhang_2010	30.001	107.009	China	37.41	16.59	1150	NA	radioisotopic	NA
Sutherland_1989	51.4708	-107.108	Canada	12.7	0.73	320	silt loam	radioisotopic	NA
Sutherland_1989	52.8	-104.415	Canada	1.8	1.29	422	sandy loam	radioisotopic	NA
Sutherland_1989	52.8256	-105.427	Canada	14.3	2.21	410	loam	radioisotopic	NA
Sutherland_1989	52.7697	-105.462	Canada	29.5	5.17	410	loam	radioisotopic	NA
Sutherland_1989	52.7558	-105.281	Canada	7	4.03	410	silt loam	radioisotopic	NA
Tang_et_al_2012	30.38	104.53	China	16.9	17.6	1037	NA	radioisotopic	NA
Tang_et_al_2012	30.38	104.53	China	48.7	36.4	1037	NA	radioisotopic	NA
Tang_et_al_2012	30.38	104.53	China	17.24	17.6	1037	NA	radioisotopic	NA
Tang_et_al_2012	30.38	104.53	China	45.08	36.4	1037	NA	radioisotopic	NA
Tang_et_al_2012	29.8961	107.734	China	8	19	1221	NA	radioisotopic	NA
Theocharopoulos_et_al_2003	38.4064	23.3358	Greece	18.34	6.5	523	clay	radioisotopic	NA
Theocharopoulos_et_al_2003	38.4064	23.3358	Greece	22.12	6.5	523	clay	radioisotopic	NA
Tiessen_et_al_2009	47	NA	Canada	27.2439	17	1134	loam	radioisotopic	NA
Tuan_et_al_2014	21.001	104.006	Vietnam	18	55	1200	NA	experimental plot	1
Tuan_et_al_2014	21.001	104.006	Vietnam	49	37	1200	NA	experimental plot	1
Tuan_et_al_2014	21.001	104.006	Vietnam	33	27	1200	NA	experimental plot	1
Tuan_et_al_2014	21.001	104.006	Vietnam	103	43	1200	NA	experimental plot	1
Tuan_et_al_2014	21.001	104.006	Vietnam	50	41	1200	NA	experimental plot	1
Tuan_et_al_2014	21.001	104.006	Vietnam	111	74	1200	NA	experimental plot	1
Tuan_et_al_2014	21.001	104.006	Vietnam	22	55	1200	NA	experimental plot	1
Tuan_et_al_2014	21.001	104.006	Vietnam	30	37	1200	NA	experimental plot	1
Tuan_et_al_2014	21.001	104.006	Vietnam	10	27	1200	NA	experimental plot	1
Tuan_et_al_2014	21.001	104.006	Vietnam	29	43	1200	NA	experimental plot	1
Tuan_et_al_2014	21.001	104.006	Vietnam	14	41	1200	NA	experimental plot	1
Tuan_et_al_2014	21.001	104.006	Vietnam	55	74	1200	NA	experimental plot	1
Van_Rompey_et_al_2001	50.847	2.949	Belgium	2.3	1.7	741	NA	experimental plot	3
Van_Rompey_et_al_2001	50.933	2.883	Belgium	0.6	1.1	727	NA	experimental plot	3
Van_Rompey_et_al_2001	50.806	4.588	Belgium	4.8	2.8	784	NA	experimental plot	3
Van_Rompey_et_al_2001	50.845	4.568	Belgium	5.9	2.7	784	NA	experimental plot	3
Van_Rompey_et_al_2001	50.845	4.568	Belgium	11.1	2.9	784	NA	experimental plot	11
Van_Rompey_et_al_2001	50.917	4.757	Belgium	4.7	3.4	761	NA	experimental plot	11
Van_Rompey_et_al_2001	50.932	2.826	Belgium	2.6	3.5	719	NA	experimental plot	46
Van_Rompey_et_al_2001	50.828	4.373	Belgium	3.8	3.7	817	NA	experimental plot	3
Van_Rompey_et_al_2001	50.883	3.7167	Belgium	1.2	2.4	783	NA	experimental plot	6
Van_Rompey_et_al_2001	50.807	3.618	Belgium	1.7	4.7	785	NA	experimental plot	4
Van_Rompey_et_al_2001	50.767	4.874	Belgium	20.6	4.7	748	NA	experimental plot	3
Van_Rompey_et_al_2001	50.881	4.471	Belgium	3.5	1.4	786	NA	experimental plot	2
Van_Rompey_et_al_2001	50.844	4.436	Belgium	3.1	1.1	786	NA	experimental plot	3
Van_Rompey_et_al_2001	50.9208	3.6889	Belgium	2.2	2.4	801	NA	experimental plot	3
Van_Rompey_et_al_2001	50.933	2.8833	Belgium	1.6	0.9	727	NA	experimental plot	2
Van_Rompey_et_al_2001	50.863	4.516	Belgium	7.9	4.7	791	NA	experimental plot	3
Van_Rompey_et_al_2001	50.938	2.87084	Belgium	0.4	1.6	725	NA	experimental plot	4
Van_Rompey_et_al_2001	50.867	3.8833	Belgium	0.7	2.4	797	NA	experimental plot	4
Van_Rompey_et_al_2001	50.865	4.353	Belgium	3.2	2.8	790	NA	experimental plot	3
Van_Rompey_et_al_2001	50.901	3.527	Belgium	1.5	2.5	808	NA	experimental plot	2
Van_Rompey_et_al_2001	50.807	4.483	Belgium	1.6	1.7	808	NA	experimental plot	4
Verbist_et_al_2010	NA	NA	Indonesia	2.5	19.7	2500	NA	experimental plot	1
Walling_and_Whelan_2003	50.7908	-3.65583	United Kingdom	10.4	15	800	loam	radioisotopic	NA
Walling_and_Whelan_2003	50.7908	-3.65583	United Kingdom	6.2	11	800	loam	radioisotopic	NA
Williams_and_Wuest_2011	45.718	-118.55	United States of America	3e-06	5	206.4	NA	experimental plot	1
Williams_and_Wuest_2011	45.718	-118.55	United States of America	2e-06	5	246	NA	experimental plot	1
Williams_and_Wuest_2011	45.718	-118.55	United States of America	0.000297	5	191	NA	experimental plot	1
Williams_and_Wuest_2011	45.718	-118.55	United States of America	2e-06	5	206.4	NA	experimental plot	1
Williams_and_Wuest_2011	45.718	-118.55	United States of America	0.000377	5	246	NA	experimental plot	1
Williams_and_Wuest_2011	45.718	-118.55	United States of America	0.000242	5	191	NA	experimental plot	1
Xiaojun_et_al_2013	30.001	104	China	24.41	4	872	NA	radioisotopic	NA
Xiaojun_et_al_2013	30.001	104	China	28.01	7	872	NA	radioisotopic	NA
Xiaojun_et_al_2013	30.001	104	China	39.77	19	872	NA	radioisotopic	NA
Xiaojun_et_al_2013	30.001	104	China	39.77	26	872	NA	radioisotopic	NA
Xu_et_al_2010	31.02	110.012	China	19.7	46.6308	1305.1	NA	experimental plot	1
Xu_et_al_2010	31.02	110.012	China	16.36	46.6308	930	NA	experimental plot	1
Xu_et_al_2010	31.02	110.012	China	8.133	46.6308	1038.8	NA	experimental plot	1
Xu_et_al_2010	31.02	110.012	China	7.45	46.6308	873.4	NA	experimental plot	1
Xu_et_al_2010	31.02	110.012	China	4.523	46.6308	1019.5	NA	experimental plot	1
Xu_et_al_2010	31.02	110.012	China	11.233	46.6308	1033.4	NA	experimental plot	5
Xu_et_al_2010	31.02	110.012	China	14.457	46.6308	1305.1	NA	experimental plot	1
Xu_et_al_2010	31.02	110.012	China	9.788	46.6308	930	NA	experimental plot	1
Xu_et_al_2010	31.02	110.012	China	4.222	46.6308	1038.8	NA	experimental plot	1
Xu_et_al_2010	31.02	110.012	China	4.757	46.6308	873.4	NA	experimental plot	1
Xu_et_al_2010	31.02	110.012	China	3.763	46.6308	1019.5	NA	experimental plot	1
Xu_et_al_2010	31.02	110.012	China	7.398	46.6308	1033.4	NA	experimental plot	5
Xu_et_al_2010	31.02	110.012	China	16	46.6308	1355.9	NA	experimental plot	1
Xu_et_al_2010	31.02	110.012	China	7.1	46.6308	740.4	NA	experimental plot	1
Xu_et_al_2010	31.02	110.012	China	11.5	46.6308	1125.9	NA	experimental plot	1
Xu_et_al_2010	31.02	110.012	China	4	46.6308	1056.9	NA	experimental plot	1
Xu_et_al_2010	31.02	110.012	China	8.3	46.6308	881.9	NA	experimental plot	1
Xu_et_al_2010	31.02	110.012	China	9.38	46.6308	1032.2	NA	experimental plot	9
Xu_et_al_2010	31.02	110.012	China	4.8	46.6308	1355.9	NA	experimental plot	1
Xu_et_al_2010	31.02	110.012	China	3.3	46.6308	740.4	NA	experimental plot	1
Xu_et_al_2010	31.02	110.012	China	2.4	46.6308	1125.9	NA	experimental plot	1
Xu_et_al_2010	31.02	110.012	China	2.2	46.6308	1056.9	NA	experimental plot	1
Xu_et_al_2010	31.02	110.012	China	2.8	46.6308	881.9	NA	experimental plot	1
Xu_et_al_2010	31.02	110.012	China	3.1	46.6308	1032.2	NA	experimental plot	9
Xu_et_al_2010	31.02	110.012	China	5.1	46.6308	1355.9	NA	experimental plot	1
Xu_et_al_2010	31.02	110.012	China	3.5	46.6308	740.4	NA	experimental plot	1
Xu_et_al_2010	31.02	110.012	China	2.4	46.6308	1125.9	NA	experimental plot	1
Xu_et_al_2010	31.02	110.012	China	2.1	46.6308	1056.9	NA	experimental plot	1
Xu_et_al_2010	31.02	110.012	China	3	46.6308	881.9	NA	experimental plot	1
Xu_et_al_2010	31.02	110.012	China	3.22	46.6308	1032.2	NA	experimental plot	9
Young_et_al_2014	42.0347	-93.62	United States of America	3.2	2	835	NA	radioisotopic	NA
Young_et_al_2014	42.0347	-93.62	United States of America	4.5	2.6	835	NA	radioisotopic	NA
Zhang_et_al_1997	37.235	109.496	China	45	17.273	513	silt	radioisotopic	NA
Zhang_et_al_1997	37.235	109.496	China	85.84	33.0718	513	silt	radioisotopic	NA
Zhang_et_al_1997	37.235	109.496	China	158.51	71.3293	513	silt loam	radioisotopic	NA
Zhang_et_al_1998	36.9733	109.196	China	57.4667	18.5339	549	silt loam	radioisotopic	NA
Zhang_et_al_1998	36.9733	109.196	China	75.7333	28.6745	549	silt loam	radioisotopic	NA
Zhang_et_al_1998	36.9733	109.196	China	95.3	64.9408	549	silt loam	radioisotopic	NA
Zhang_et_al_2000	29.6667	102.117	China	49.14	67	1100	sandy loam	radioisotopic	NA
Zhang_et_al_2003a	34.5833	105.733	China	45.98	35	612	silt	radioisotopic	NA
Zhang_et_al_2003a	34.5833	105.733	China	53.1	33	612	silt	radioisotopic	NA
Zhang_et_al_2003a	34.5833	105.733	China	28.64	23	612	silt	radioisotopic	NA
Zhang_et_al_2003a	34.5833	105.733	China	82.16	60	612	silt	radioisotopic	NA
Zhang_et_al_2003a	34.5833	105.733	China	0	0	612	silt	radioisotopic	NA
Zhang_et_al_2003a	32.5333	107.883	China	74.67	17.6	975	loam	radioisotopic	NA
Zhang_et_al_2003a	32.5333	107.883	China	9.85	67	975	NA	radioisotopic	NA
Zhang_et_al_2003a	32.5333	107.883	China	42	12	975	loam	radioisotopic	NA
Zhang_et_al_2003a	30.8	106.083	China	46.63	19	1113	NA	radioisotopic	NA
Zhang_et_al_2003a	30.8	106.083	China	7.58	8.7	1113	NA	radioisotopic	NA
Zhang_et_al_2003a	30.8	106.083	China	67.8	25	1113	NA	radioisotopic	NA
Zhang_et_al_2003a	31.2111	108.407	China	94.52	47	1241	NA	radioisotopic	NA
Zhang_et_al_2003a	31.2111	108.407	China	74.81	47	1241	NA	radioisotopic	NA
Zhang_et_al_2003a	31.2111	108.407	China	98.54	47	1241	NA	radioisotopic	NA
Zhang_et_al_2003a	31.2111	108.407	China	2.86	0	1241	NA	radioisotopic	NA
Zhang_et_al_2003a	31.0167	110.583	China	20.59	60	1177	clay	radioisotopic	NA
Zhang_et_al_2003a	25.3417	101.567	China	62.71	36	768	NA	radioisotopic	NA
Zhang_et_al_2003a	25.3417	101.567	China	0.08	0	768	NA	radioisotopic	NA
Zhang_et_al_2003a	24.9136	103.148	China	85.43	47	886	NA	radioisotopic	NA
Zhang_et_al_2003a	24.9136	103.148	China	0	0	886	NA	radioisotopic	NA
Zhang_et_al_2003a	25.7178	101.861	China	27.4	27	639	loam	radioisotopic	NA
Zhang_et_al_2003a	25.7178	101.861	China	14.05	9	639	loam	radioisotopic	NA
Zhang_et_al_2003b	31.2283	119.797	China	1.7	1.7	1386	loam	radioisotopic	NA
Zhang_et_al_2003b	31.2283	119.797	China	28.62	6	1386	loam	radioisotopic	NA
Zheng_et_al_2007	29.5833	105.05	China	31.9	18.5339	1064	sand	radioisotopic	NA
Zhuang_et_al_2005	28.2167	116.917	China	29.68	16	1800	clay	radioisotopic	NA
