# Supplementary material for: Uncertainties, sensitivities and robustness of simulated water erosion in an EPIC-based global-gridded crop model
Source: Copernicus journal article supplement (doi:10.5194/bg-2020-93), 2020-04-21
Supplement: Supplementary file 3 [file TWCarr-si03.docx]

Afshar, F. A., Ayoubi, S., & Jalalian, A. (2010). Soil redistribution rate and its relationship with soil organic carbon and total nitrogen using 137 Cs technique in a cultivated complex hillslope in western Iran. *Journal of Environmental Radioactivity*, *101*(8), 606–614. https://doi.org/10.1016/j.jenvrad.2010.03.008

An, J., Zheng, F., & Wang, B. (2014). Using 137 Cs technique to investigate the spatial distribution of erosion and deposition regimes for a small catchment in the black soil region, Northeast China. *Catena*, *123*, 243–251. https://doi.org/10.1016/j.catena.2014.08.009

Andrello, A. C., Appoloni, C. R., Cassol, E. A., & Melquiades, F. L. (2006). 137Cs profiles in erosion plots with different soil cultivation. *Journal of Radioanalytical and Nuclear Chemistry*, *269*(3), 761–765. https://doi.org/10.1007/s10967-006-0297-0

Andrello, A. C., Appoloni, C. R., & Guimarães, M. F. (2003). Uso do césio-137 para avaliar taxas de erosão em cultura de soja, café e pastagem. *Revista Brasileira de Ciência Do Solo*, *27*(2), 223–229. https://doi.org/10.1590/s0100-06832003000200002

Andrello, C. A., Appoloni, C. R., & De Fátima Guimarães, M. (2004). Soil Erosion Determination in a Watershed from Northern Paraná (Brazil) Using 137 Cs. *Brazilian Archives of Biology and Technology*, *47*(August), 659–667.

Bacchi, O. O. S., Reichard, K., Sparovek, G., & Ranieri, S. B. L. (2000). Soil erosion evaluation in a small watershed in Brazil through 137Cs fallout redistribution analysis and conventional models. *Acta Geologica Hispanica*, *35*(3–4), 251–259.

Bacchi, O. O. S., Reichardt, K., & Sparovek, G. (2003). Sediment spatial distribution evaluated by three methods and its relation to some soil properties. *Soil and Tillage Research*, *69*(1–2), 117–125. https://doi.org/10.1016/S0167-1987(02)00133-2

Bajracharya, R. M., Lal, R., & John, J. M. (1998). Use of radioactive fallout cesium-137 to estimate soil erosion in three farms in west central Ohio. *Soil Science*, *163*(2), 133–142.

Basher, L. R., & Ross, C. W. (2002). Soil erosion rates under intensive vegetable production on clay loam, strongly structured soils at Pukekohe, New Zealand. *Australian Journal of Soil Research*, *40*(6).

Benmansour, M., Mabit, L., Nouira, A., Moussadek, R., Bouksirate, H., Duchemin, M., & Benkdad, A. (2013). Assessment of soil erosion and deposition rates in a Moroccan agricultural field using fallout 137 Cs and 210 Pb ex. *Journal of Environmental Radioactivity*, *115*, 97–106. https://doi.org/10.1016/j.jenvrad.2012.07.013

Bouhlassa, S., Moukhchane, M., & Aiachi, A. (2000). Estimates of soil erosion and deposition of cultivated soil of Nakhla watershed, Morocco, using 137Cs technique and calibration models. *Acta Geologica Hispanica*, *35*(3–4), 239–249.

Brígido Flores, O., & Gandarilla Benitez, J. E. (1999). Preliminary assessment of the potential for using Cesium-137 technique to estimate rates of soil erosion on cultivated land in “La Victoria I”, Camaguey Province of Cuba. In *Proceedings of the II International Symposium on Nuclear and Related Techniques in Agriculture, Industry and Environment. II Workshop on Nuclear and Related Techniques in Environment*.

Brígido Flores, O., Gandarilla Benitez, J., Montalvan Estrada, A., & Barreras Caballero, A. (2002). Estimating soil erosion using fallout Caesium-137 in cultivated land at the watershed of Máximo River , Cuba . *Transactions of the 17th World Congress of Soil Science. Bangkok, Thailand August 14-21.*, 1–10.

Bujan, A., Yañez, M., Santanatoglia, O. J., Chagas, C., Massobrio, M., Castiglioni, M., et al. (2003). Soil erosion evaluation in a small basin through the use of 137Cs technique. *Soil and Tillage Research*, *69*(1–2), 127–137. https://doi.org/10.1016/S0167-1987(02)00134-4

Busacca, A. J., Cook, C. A., & Mulla, D. J. (1993). Comparing landscape-scale estimation of soil erosion in the Palouse using Cs-137 and RUSLE. *Journal of Soil and Water Conservation*, *48*(4), 361–367.

Cao, Y. Z., Coote, D. R., Wang, C., & Nolin, M. C. (1993). Using 137 Cs to investigate net soil erosion at two soil benchmark sites in Quebec. *Canadian Journal of Soil Science*, *73*(4), 515–526. https://doi.org/10.4141/cjss93-052

Casalí, J., Gastesi, R., Álvarez-Mozos, J., De Santisteban, L. M., de Lersundi, J. D. V., Giménez, R., et al. (2008). Runoff, erosion, and water quality of agricultural watersheds in central Navarre (Spain). *Agricultural Water Management*. https://doi.org/10.1016/j.agwat.2008.06.013

Chambers, B. J., & Garwood, T. W. D. (2006). Monitoring of water erosion on arable farms in England and Wales. 1990-94. *Soil Use and Management*. https://doi.org/10.1111/j.1475-2743.2000.tb00181.x

Chartin, C., Salvador-Blanes, S., Olivier, E., Van Oost, K., Hinschberger, F., & Macaire, J. J. (2014). Impact of land consolidation and ﬁeld borders on soil erosion and storage within agricultural landscapes. *Geophysical Research Abstracts*, *16*, EGU2014--10372--1.

Chartin, C., Evrard, O., Salvador-Blanes, S., Hinschberger, F., Van Oost, K., Lefèvre, I., et al. (2013). Quantifying and modelling the impact of land consolidation and field borders on soil redistribution in agricultural landscapes (1954-2009). *Catena*. https://doi.org/10.1016/j.catena.2013.06.006

Collins, A. L., Walling, D. E., Sichingabula, H. M., & Leeks, G. J. L. (2001). Using 137Cs measurements to quantify soil erosion and redistribution rates for areas under different land use in the Upper Kaleya River basin, southern Zambia. *Geoderma*, *104*(3–4), 299–323. https://doi.org/10.1016/S0016-7061(01)00087-8

Correchel, V., Bacchi, O. O. S., De Maria, I. C., Dechen, S. C. F., & Reichardt, K. (2006). Erosion rates evaluated by the 137Cs technique and direct measurements on long-term runoff plots under tropical conditions. *Soil and Tillage Research*, *86*(2), 199–208. https://doi.org/10.1016/j.still.2005.02.021

Damnati, B., Ibrahimi, S., & Radakovitch, O. (2013). Quantifying erosion using 137Cs and 210Pb in cultivated soils in three Mediterranean watershed: Synthesis study from El Hachef, Raouz and Nakhla (North West Morocco). *Journal of African Earth Sciences*, *79*, 50–57. https://doi.org/10.1016/j.jafrearsci.2012.10.006

Estrany, J., Garcia, C., & Walling, D. E. (2010). An investigation of soil erosion and redistribution in a Mediterranean lowland agricultural catchment using caesium-137. *International Journal of Sediment Research*, *25*(1), 1–16. https://doi.org/10.1016/S1001-6279(10)60023-6

Fang, H., Sun, L., Qi, D., & Cai, Q. (2012). Using 137Cs technique to quantify soil erosion and deposition rates in an agricultural catchment in the black soil region, Northeast China. *Geomorphology*, *169*–*170*, 142–150. https://doi.org/10.1016/j.geomorph.2012.04.019

Fang, H., Yang, X., Zhang, X., & Liang, A. (2006). Using 137Cs Tracer Technique to Evaluate Erosion and Deposition of Black Soil in Northeast China. *Pedosphere*, *16*(2), 201–209.

Fornes, W. L., Whiting, P. J., Wilson, C. G., & Matisoff, G. (2005). Caesium-137-derived erosion rates in an agricultural setting: The effects of model assumptions and management practices. *Earth Surface Processes and Landforms*, *30*(9), 1181–1189. https://doi.org/10.1002/esp.1269

Forsyth, T. J. (1994). The Use of Cesium-137 Measurements of Soil Erosion and Farmers’ Perceptions to Indicate Land Degradation amongst Shifting Cultivators in Northern Thailand. *Mountain Research and Development*, *14*(3), 229–244.

Fulajtar, E. (2003). Assessment of soil erosion on arable land using 137Cs measurements: A case study from Jaslovske Bohunice, Slovakia. *Soil and Tillage Research*, *69*(1–2), 139–152. https://doi.org/10.1016/S0167-1987(02)00135-6

Gafur, A., Jensen Jens Raunsøand Borggaard, O. K., & Petersen, L. (2003). Runoff and losses of soil and nutrients from small watersheds under shifting cultivation (Jhum) in the Chittagong Hill Tracts of Bangladesh. *Journal of Hydrology*. https://doi.org/10.1016/S0022-1694(03)00263-4

Gana, B. K. (2000). *Effects of agriculture on soil quality in northeastern Ghana*. University of Saskatchewan.

Garcia-Oliva, F., Martinez Lugo, R., & Maass, J. M. (1995). Long-term net soil erosion as determined by 137Cs redistribution in an undisturbed and perturbed tropical deciduous forest ecosystem. *Geoderma*, *68*(1–2), 135–147. https://doi.org/10.1016/0016-7061(95)00030-R

Gaspar, L., Navas, A., Walling, D. E., Machín, J., & Gómez Arozamena, J. (2013). Using 137Cs and 210Pbex to assess soil redistribution on slopes at different temporal scales. *Catena*, *102*, 46–54. https://doi.org/10.1016/j.catena.2011.01.004

Gharibreza, M., Raj, J. K., Yusoff, I., Othman, Z., Tahir, W. Z. W. M., & Ashraf, M. A. (2013). Land use changes and soil redistribution estimation using 137Cs in the tropical Bera Lake catchment, Malaysia. *Soil and Tillage Research*, *131*, 1–10. https://doi.org/10.1016/j.still.2013.02.010

Giménez, R., Casalí, J., Grande, I., Díez, J., Campo, M. A., Álvarez-Mozos, J., & Goñi, M. (2012). Factors controlling sediment export in a small agricultural watershed in Navarre (Spain). *Agricultural Water Management*. https://doi.org/10.1016/j.agwat.2012.03.007

Hai, P. S., Khoa, T. D., Dao, N., Mui, N. T., Hoa, T. V, Hien, P. D., & Tu, T. C. (2011). Application of Caesium-137 and Beryllium-7 To Assess the Effectiveness of Soil Conservation Technologies in the Central Highlands of Vietnam. *Soil Conservation Measures on Erosion Control and Soil Quality*, 195.

Häring, V., Fischer, H., & Stahr, K. (2014). Erosion of bulk soil and soil organic carbon after land use change in northwest Vietnam. *Catena*, *122*, 111–119. https://doi.org/10.1016/j.catena.2014.06.015

Hassouni, K., & Bouhlassa, S. (2006). Estimate of soil erosion on cultivated soils using 137 Cs measurements and calibration models: A case study from Nakhla watershed, Morocco . *Canadian Journal of Soil Science*, *86*(1), 77–87. https://doi.org/10.4141/s04-052

Iurian, A. R., Mabit, L., Begy, R., & Cosma, C. (2013). Comparative assessment of erosion and deposition rates on cultivated land in the Transylvanian Plain of Romania using 137Cs and 210Pbex. *Journal of Environmental Radioactivity*, *125*, 40–49. https://doi.org/10.1016/j.jenvrad.2013.02.009

Jia, Y. H., Wang, Z. Y., Zheng, X. M., & Han, L. J. (2012). Estimation of soil erosion in the Xihanshui River Basin by using 137Cs technique. *International Journal of Sediment Research*, *27*(4), 486–497. https://doi.org/10.1016/S1001-6279(13)60007-4

Junge, B., Mabit, L., Dercon, G., Walling, D. E., Abaidoo, R., Chikoye, D., & Stahr, K. (2010). First use of the 137 Cs technique in Nigeria for estimating medium-term soil redistribution rates on cultivated farmland. *Soil and Tillage Research*, *110*(2), 211–220. https://doi.org/10.1016/j.still.2010.07.012

Kabanza, A. K., Dondeyne, S., Kimaro, D. N., Kafiriti, E., Poesen, J., & Deckers, J. A. (2013). Effectiveness of soil conservation measures in two contrasting landscape units of South Eastern Tanzania. *Zeitschrift Für Geomorphologie*. https://doi.org/10.1127/0372-8854/2013/0102

Lacoste, M., Michot, D., Viaud, V., Evrard, O., & Walter, C. (2014). Combining 137Cs measurements and a spatially distributed erosion model to assess soil redistribution in a hedgerow landscape in northwestern France (1960-2010). *Catena*, *119*, 78–89. https://doi.org/10.1016/j.catena.2014.03.004

Li, S., Lobb, D. A., Kachanoski, R. G., & McConkey, B. G. (2011). Comparing the use of the traditional and repeated-sampling-approach of the 137Cs technique in soil erosion estimation. *Geoderma*, *160*(3–4), 324–335. https://doi.org/10.1016/j.geoderma.2010.09.029

Li, Y., & Lindstrom, M. J. (2001). Evaluating Soil Quality–Soil Redistribution Relationship on Terraces and Steep Hillslope. *Soil Science Society of America Journal*, *65*(5), 1500. https://doi.org/10.2136/sssaj2001.6551500x

Li, Y., Poesen, J., Yang, J. C., Fu, B., & Zhang, J. H. (2003). Evaluating gully erosion using 137 Cs and 210 Pb/ 137 Cs ratio in a reservoir catchment. *Soil and Tillage Research*, *69*(1–2), 107–115. https://doi.org/10.1016/S0167-1987(02)00132-0

Loughran, R. J., & Elliott, G. L. (1996). Rates of soil erosion in Australia determined by the caesium-137 technique: A national reconnaissance survey. *IAHS-AISH Publication*, *236*(December), 275–282. Retrieved from https://www.scopus.com/inward/record.uri?eid=2-s2.0-3743100462&partnerID=40&md5=b40172347cad2b60c34d8aaf528ee1a3

Loughran, R. J., Elliott, G. L., Campbell, B. L., & Shelly, D. J. (1988). Estimation of soil erosion from caesium-137 measurements in a small, cultivated catchment in Australia. *International Journal of Radiation Applications and Instrumentation. Part*, *39*(11), 1153–1157. https://doi.org/10.1016/0883-2889(88)90009-3

Lu, X. X., & Higgitt, D. L. (2000). Estimating erosion rates on sloping agricultural land in the Yangtze Three Gorges, China, from caesium-137 measurements. *Catena*, *39*(1), 33–51. https://doi.org/10.1016/S0341-8162(99)00081-8

Mabit, L., Chhem-Kieth, S., Dornhofer, P., Toloza, A., Benmansour, M., Bernard, C., et al. (2014). *137Cs a widely used and validated medium term soil tracer*. *Guidelines for Using Fallout Radionuclides to Assess Erosion and Effectiveness of Soil Conservation Strategies*.

Mabit, L., Klik, A., Benmansour, M., Toloza, A., Geisler, A., & Gerstmann, U. C. (2009). Assessment of erosion and deposition rates within an Austrian agricultural watershed by combining 137Cs, 210Pbex and conventional measurements. *Geoderma*, *150*(3–4), 231–239. https://doi.org/10.1016/j.geoderma.2009.01.024

Mabit, L., Bernard, C., & Laverdière, M. R. (2007). Assessment of erosion in the Boyer River watershed (Canada) using a GIS oriented sampling strategy and 137Cs measurements. *Catena*, *71*(2), 242–249. https://doi.org/10.1016/j.catena.2006.02.011

Menzel, R. G., Jung, P. K., Ryu, K. S., & Um, K. T. (1987). Estimating soil erosion losses in Korea with fallout cesium-137. *International Journal of Radiation Applications and Instrumentation. Part*, *38*(6), 451–454. https://doi.org/10.1016/0883-2889(87)90098-0

Merten, G. H., Minella, J. P. G., Moro, M., Maier, C., Cassol, E. A., Walling, D. E., et al. (2010). The effects of soil conservation on sediment yield and sediment source dynamics in a catchment in southern Brazil. In *IAHS-AISH Publication*.

Merten, G. H., & Minella, J. P. G. (2006). Impact on sediment yield due to the intensification of tobacco production in a catchment in Southern Brazil. *Ciência Rural*. https://doi.org/10.1590/s0103-84782006000200050

Nadal-Romero, E., Lasanta, T., & García-Ruiz, J. M. (2013). Runoff and sediment yield from land under various uses in a Mediterranean mountain area: Long-term results from an experimental station. *Earth Surface Processes and Landforms*. https://doi.org/10.1002/esp.3281

Nagle, G. N., & Ritchie, J. C. (2004). Wheat field erosion rates and channel bottom sediment sources in an intensively cropped Northeastern Oregon drainage basin. *Land Degradation and Development*, *15*(1), 15–26. https://doi.org/10.1002/ldr.587

Nagle, G. N., Lassoie, J. P., Fahey, T. J., & McIntyre, S. C. (2000). The use of caesium-137 to estimate agricultural erosion on steep slopes in a tropical watershed. *Hydrological Processes*, *14*(5), 957–969. https://doi.org/10.1002/(SICI)1099-1085(20000415)14:5<957::AID-HYP3>3.0.CO;2-6

Navas, A., López-Vicente, M., Gaspar, L., & Machín, J. (2013). Assessing soil redistribution in a complex karst catchment using fallout 137Cs and GIS. *Geomorphology*, *196*, 231–241. https://doi.org/10.1016/j.geomorph.2012.03.018

Nouira, A., Sayouty, E. H., & Benmansour, M. (2003). Use of 137Cs technique for soil erosion study in the agricultural region of Casablanca in Morocco. *Journal of Environmental Radioactivity*, *68*(1), 11–26. https://doi.org/10.1016/S0265-931X(03)00025-0

Oeurng, C., Sauvage, S., & Sánchez-Pérez, J. M. (2010). Dynamics of suspended sediment transport and yield in a large agricultural catchment, southwest France. *Earth Surface Processes and Landforms*. https://doi.org/10.1002/esp.1971

Poręba, G., Bluszcz, A., & Śnieszko, Z. (2006). Study of soil erosion in the small loess agricultural catchment in the light of 137 Cs measurements, 1–4.

Porto, P., & Walling, D. E. (2012). Validating the use of 137Cs and 210Pb ex measurements to estimate rates of soil loss from cultivated land in southern Italy. *Journal of Environmental Radioactivity*, *106*, 47–57. https://doi.org/10.1016/j.jenvrad.2011.11.005

Porto, P., Walling, D. E., & Callegari, G. (2011). Using 137Cs measurements to establish catchment sediment budgets and explore scale effects. *Hydrological Processes*. https://doi.org/10.1002/hyp.7874

Porto, P., Walling, D. E., & Capra, A. (2014). Using 137Cs and 210Pbex measurements and conventional surveys to investigate the relative contributions of interrill/rill and gully erosion to soil loss from a small cultivated catchment in Sicily. *Soil and Tillage Research*, *135*, 18–27. https://doi.org/10.1016/j.still.2013.08.013

Quijano, L., Beguería, S., Gaspar, L., & Navas, A. (2016). Estimating erosion rates using 137Cs measurements and WATEM/SEDEM in a Mediterranean cultivated field. *Catena*, *138*, 38–51. https://doi.org/10.1016/j.catena.2015.11.009

Quine, T. A., Walling, D. E., Chakela, Q. K., Mandiringana, O. T., & Zhang, X. (1999). Rates and patterns of tillage and water erosion on terraces and contour strips: Evidence from caesium-137 measurements. *Catena*, *36*(1–2), 115–142. https://doi.org/10.1016/S0341-8162(99)00006-5

Quine, T. A., Walling, D. E., & Mandiringana, O. T. (1993). An investigation of the influence of edaphic, topographic and land- use controls on soil erosion on agricultural land in the Borrowdale and Chinamora areas, Zimbabwe, based on caesium-137 measurements. *Sediment Problems. Proc. International Symposium, Yokohama, 1993*, (217), 185–196.

Quine, T. A., Walling, D. E., Zhang, X., & Wang, Y. (1992). Investigation of soil erosion on terraced fields near Yanting, Sichuan Province, China, using caesium-137. *Erosion, Debris Flows and Environment in Mountain Regions. Proc. International Symposium, Chengdu, 1992*, (209).

Quine, T. A., Govers, G., Walling, D. E., Zhang, X., Desmet, P. J. J., Zhang, Y., & Vandaele, K. (1997). Erosion processes and landform evolution on agricultural land — new perspectives from caesium-137 measurements and topographic‐based erosion modelling. *Earth Surface Processes and Landforms*, *22*(9), 799–816. https://doi.org/10.1002/(sici)1096-9837(199709)22:9<799::aid-esp765>3.3.co;2-i

Rabesiranana, N., Rasolonirina, M., Solonjara, A. F., Ravoson, H. N., Raoelina Andriambololona, & Mabit, L. (2016). Assessment of soil redistribution rates by 137Cs and 210Pbex in a typical Malagasy agricultural field. *Journal of Environmental Radioactivity*, *152*(February), 112–118. https://doi.org/10.1016/j.jenvrad.2015.11.007

Rijsdijk, A., Bruijnzeel, L. A. (Sampurno., & Prins, T. M. (2007). Sediment yield from gullies, riparian mass wasting and bank erosion in the Upper Konto catchment, East Java, Indonesia. *Geomorphology*. https://doi.org/10.1016/j.geomorph.2006.06.041

Ruecker, G. R., Park, S. J., Brunner, A. C., & Vlek, P. L. G. (2008). Assessment of soil redistribution on two contrasting hillslopes in Uganda using Caesium-137 modelling. *Erdkunde*, *62*(3), 259–272. https://doi.org/10.3112/erdkunde.2008.03.06

Saç, M. M., & İçhedef, M. (2015). Application of 137 Cs technique for evaluation of erosion and deposition rates within cultivated fields of Salihli region, Western Turkey . *Journal of Radiation Research and Applied Sciences*, *8*(4), 477–482. https://doi.org/10.1016/j.jrras.2015.04.001

Sac, M. M., Yumurtaci, E., Yener, G., Camgoz, B., Ugur, A., & Ozden, B. (2008). Soil erosion determinations by using 137Cs technique in the agricultural regions of Gediz Basin, Western Turkey. *Environ Geol*, *55*, 477–483.

Sadiki, A., Faleh, A., Navas, A., & Bouhlassa, S. (2007). Assessing soil erosion and control factors by the radiometric technique in the Boussouab catchment, Eastern Rif, Morocco. *Catena*, *71*(1), 13–20. https://doi.org/10.1016/j.catena.2006.10.003

Schimmack, W., Auerswald, K., & Bunzl, K. (2002). Estimation of soil erosion and deposition rates at an agricultural site in Bavaria, Germany, as derived from fallout radiocesium and plutonium as tracers. *Naturwissenschaften*, *89*(1), 43–46. https://doi.org/10.1007/s00114-001-0281-z

Schuller, P., Sepulveda, A., Trumber, R. E., & Castillo, A. (2000). Application of the 137Cs technique to quantify soil redistribution rates in paleohumults from Central-South Chile. *Acta Geologica Hispanica*, *35*(3–4), 285–290.

Schuller, P., & Walling, D. E. (2014). The use of 7Be and 137Cs in soil redistribution investigations in Chile. In *Guidelines for Using Fallout Radionuclides to Assess Erosion and Effectiveness of Soil Conservation Strategies*.

Shi, Z., Wen, A., Zhang, X., He, X., Li, H., & Yan, D. (2012). 137Cs and 210Pb ex as soil erosion tracers in the hilly Sichuan Basin and the Three Gorges area of China. *Journal of Mountain Science*, *9*(1), 27–33. https://doi.org/10.1007/s11629-012-2200-5

Sparovek, G., Bacchi, O. O. S., Schnug, E., Ranieri, S. B. L., & DeMaria, I. C. (2000). Comparison of Three Water Erosion Prediction Methods (137Cs, WEPP, USLE) in South-East Brazilian Sugarcane Production. *Journal of Agriculture in the Tropics and Subtropics*, *101*(2), 107–118.

Su, Z. A., & Zhang, J. H. (2010). Effects of tillage erosion on soil redistribution in a purple soil with steep sloping terraces. In *2010 International Conference on Management and Service Science, MASS 2010*. https://doi.org/10.1109/ICMSS.2010.5577125

Sutherland, R. A. (1989). Quantification of accelerated soil erosion using the environmental tracer caesium‐137. *Land Degradation & Development*, *1*(3), 199–208. https://doi.org/10.1002/ldr.3400010304

Tang, Q., Bao, Y., He, X., Zhu, B., & Zhang, X. (2012). Farmer’s adaptive strategies on land competition between societal outcomes and agroecosystem conservation in the purple-soiled hilly region, southwestern China. *Journal of Mountain Science*, *9*(1), 77–86. https://doi.org/10.1007/s11629-012-2201-4

Theocharopoulos, S. P., Florou, H., Walling, D. E., Kalantzakos, H., Christou, M., Tountas, P., & Nikolaou, T. (2003). Soil erosion and deposition rates in a cultivated catchment area in central Greece, estimated using the 137Cs technique. *Soil and Tillage Research*, *69*(1–2), 153–162. https://doi.org/10.1016/S0167-1987(02)00136-8

Tiessen, K. H. D., Li, S., Lobb, D. a., Mehuys, G. R., Rees, H. W., & Chow, T. L. (2009). Using repeated measurements of 137Cs and modelling to identify spatial patterns of tillage and water erosion within potato production in Atlantic Canada. *Geoderma*, *153*(1–2), 104–118. https://doi.org/10.1016/j.geoderma.2009.07.013

Tuan, V. D., Hilger, T., MacDonald, L., Clemens, G., Shiraishi, E., Vien, T. D., et al. (2014). Mitigation potential of soil conservation in maize cropping on steep slopes. *Field Crops Research*. https://doi.org/10.1016/j.fcr.2013.11.002

Van Rompaey, A. J. J., Verstraeten, G., Van Oost, K., Govers, G., & Poesen, J. (2001). Modelling mean annual sediment yield using a distributed approach. *Earth Surface Processes and Landforms*. https://doi.org/10.1002/esp.275

Verbist, B., Poesen, J., van Noordwijk, M., Widianto, Suprayogo, D., Agus, F., & Deckers, J. (2010). Factors affecting soil loss at plot scale and sediment yield at catchment scale in a tropical volcanic agroforestry landscape. *Catena*. https://doi.org/10.1016/j.catena.2009.08.007

Walling, D. E., He, Q., & Whelan, P. A. (2003). Using 137Cs measurements to validate the application of the AGNPS and ANSWERS erosion and sediment yield models in two small Devon catchments. *Soil and Tillage Research*, *69*(1–2), 27–43. https://doi.org/10.1016/S0167-1987(02)00126-5

Williams, J. D., & Wuest, S. B. (2011). Tillage and no-tillage conservation effectiveness in the intermediate precipitation zone of the inland Pacific Northwest, United States. *Journal of Soil and Water Conservation*. https://doi.org/10.2489/jswc.66.4.242

Xiaojun, N., Jianhui, Z., & Zhengan, S. (2013). Dynamics of Soil Organic Carbon and Microbial Biomass Carbon in Relation to Water Erosion and Tillage Erosion. *PLoS ONE*. https://doi.org/10.1371/journal.pone.0064059

Xu, Q., Wang, T., Li, Z., Cai, C., Shi, Z., & Jiang, C. (2010). Effect of soil conservation measurements on runoff, erosion and plant production: A case study on steeplands from the Three Gorges Area, China. *Journal of Food, Agriculture and Environment*.

Young, C. J., Liu, S., Schumacher, J. A., Schumacher, T. E., Kaspar, T. C., McCarty, G. W., et al. (2014). Evaluation of a model framework to estimate soil and soil organic carbon redistribution by water and tillage using 137Cs in two U.S. Midwest agricultural fields. *Geoderma*, *232*–*234*, 437–448. https://doi.org/10.1016/j.geoderma.2014.05.019

Zhang, X. B., Quine, T. A., Walling, D. E., & Wen, A. B. (2000). A study of soil erosion on a steep cultivated slope in the Mt. Gongga region near Luding, Sichuan, China, using the 137Cs technique. *Acta Geologica Hispanica*, *35*(3–4), 229–238.

Zhang, X., Quine, T. A., & Walling, D. E. (1998). Soil erosion rates on sloping cultivated land on the Loess Plateau near Ansai, Shaanxi Province, China: an investigation using 137Cs and rill measurements. *Hydrological Processes*, *12*(1), 171–189. https://doi.org/10.1002/(sici)1099-1085(199801)12:1<171::aid-hyp570>3.3.co;2-c

Zhang, X., Walling, D. E., Quine, T. A., & Wen, A. (1997). Use of reservoir deposits and caesium-137 measurements to investigate the erosional response of a small drainage basin in the rolling loess plateau region of China. *Land Degradation and Development*, *8*(1), 1–16. https://doi.org/10.1002/(SICI)1099-145X(199703)8:1<1::AID-LDR240>3.0.CO;2-X

Zhang, X., Zhang, Y., Wen, A., & Feng, M. (2003). Assessment of soil losses on cultivated land by using the 137Cs technique in the Upper Yangtze River Basin of China. *Soil and Tillage Research*, *69*(1–2), 99–106. https://doi.org/10.1016/S0167-1987(02)00131-9

Zhang, Y., Yang, H., Tang, X., Du, M., Zhang, H., & Peng, B. (2003). Soil erosion study on hillside in Southern Jiangsu Province using the cesium-137 tracer technique. *Soil Science and Plant Nutrition*, *49*(1), 85–92. https://doi.org/10.1080/00380768.2003.10409983

Zheng, J.-J., He, X.-B., Walling, D., Zhang, X.-B., Flanagan, D., & Qi, Y.-Q. (2007). Assessing Soil Erosion Rates on Manually-Tilled Hillslopes in the Sichuan Hilly Basin Using 137Cs and 210Pbex Measurements. *Pedosphere*, *17*(3), 273–283. https://doi.org/10.1016/s1002-0160(07)60034-4

Zhuang, S. Y., Wang, M. K., Wu, C. Y., & Yang, H. (2005). Soil Erosion Rate Estimation Using 137 Cs Technique. *Soil Science*, (1986), 120–128. https://doi.org/10.1097/01.ss.0000155495.86193.a4
